# Supplementary material for: Generalized Linear Regression Model to Determine the Threshold Effects of Climate Variables on Dengue Fever: A Case Study on Bangladesh
Source: Hindawi journal article supplement (doi:10.1155/2023/2131801), 2023-01-01

## Supporting Information

### Generalised Linear Regression model to determine the threshold effects of climate variables on Dengue Fever: A Case Study on Bangladesh

Shamima Hossain,  
Senior Lecturer, Department of Mathematical and Physical Sciences,  
East West University, Dhaka. email: [shh@ewubd.edu](mailto:shh@ewubd.edu) ; Tel.: +8801725035150

**Table S-1: Descriptive statistics of dengue cases in various months of different years (2000 to 2021).**

| Months    | Mean    | St. Dev. | Max   | Min |
|-----------|---------|----------|-------|-----|
| January   | 18.9    | 45.64    | 199   | 0   |
| February  | 6.68    | 15.3     | 58    | 0   |
| March     | 6       | 10.57    | 36    | 0   |
| April     | 10.64   | 20.89    | 73    | 0   |
| May       | 24.14   | 49.82    | 193   | 0   |
| June      | 164.1   | 398.08   | 1884  | 0   |
| July      | 1164    | 3414.66  | 16253 | 3   |
| August    | 3405.23 | 11126.68 | 52636 | 4   |
| September | 1676.96 | 3792.73  | 16856 | 3   |
| October   | 1008.55 | 1993.1   | 8143  | 0   |
| November  | 602.95  | 1074.84  | 4011  | 0   |
| December  | 602.95  | 1074.84  | 4011  | 0   |

**Table S-2: Descriptive statistics of the variable daily average Temperature (°C) in various months of different years (2000 to 2021).**

| Months   | Mean  | St. Dev. | Max  | Min  | Months    | Mean  | St. Dev. | Max  | Min  |
|----------|-------|----------|------|------|-----------|-------|----------|------|------|
| January  | 17.94 | 0.818    | 19.2 | 16.3 | July      | 28.58 | 0.314    | 29.1 | 28   |
| February | 21.51 | 0.879    | 23.6 | 19.7 | August    | 28.69 | 0.308    | 29.2 | 28.2 |
| March    | 25.64 | 0.782    | 27.2 | 24.1 | September | 28.51 | 0.331    | 29.1 | 27.7 |
| April    | 28.19 | 0.778    | 29.6 | 27.1 | October   | 27.28 | 0.455    | 28.3 | 26.5 |
| May      | 28.84 | 0.700    | 29.8 | 27.7 | November  | 23.58 | 0.490    | 24.5 | 22.8 |
| June     | 28.80 | 0.506    | 29.6 | 27.8 | December  | 19.56 | 0.669    | 20.6 | 17.9 |

**Table S-3: Descriptive statistics of the variable monthly total rainfall (mm) in various months of different years (2000 to 2021).**

| Months    | Mean   | St. Dev. | Max | Min |
|-----------|--------|----------|-----|-----|
| January   | 6.14   | 10.08    | 40  | 0   |
| February  | 15.71  | 18.05    | 61  | 0   |
| March     | 36.29  | 33.23    | 121 | 3   |
| April     | 106.71 | 62.50    | 274 | 24  |
| May       | 272.52 | 101.28   | 511 | 151 |
| June      | 498.05 | 137.2    | 832 | 261 |
| July      | 530.67 | 121.80   | 721 | 327 |
| August    | 392.48 | 102.81   | 658 | 236 |
| September | 324.38 | 99.18    | 653 | 185 |
| October   | 204.67 | 85.21    | 401 | 64  |
| November  | 27.48  | 35.22    | 98  | 0   |
| December  | 10.33  | 18.63    | 68  | 0   |

**Fig. S-1: Trends in annual dengue cases from 2000 to 2021.** The trend over the years is represented by a smooth line that was obtained using the LOESS smoothing function; the shaded area displays the pointwise 95% confidence interval. Dots represent the total number of dengue cases in a given year.

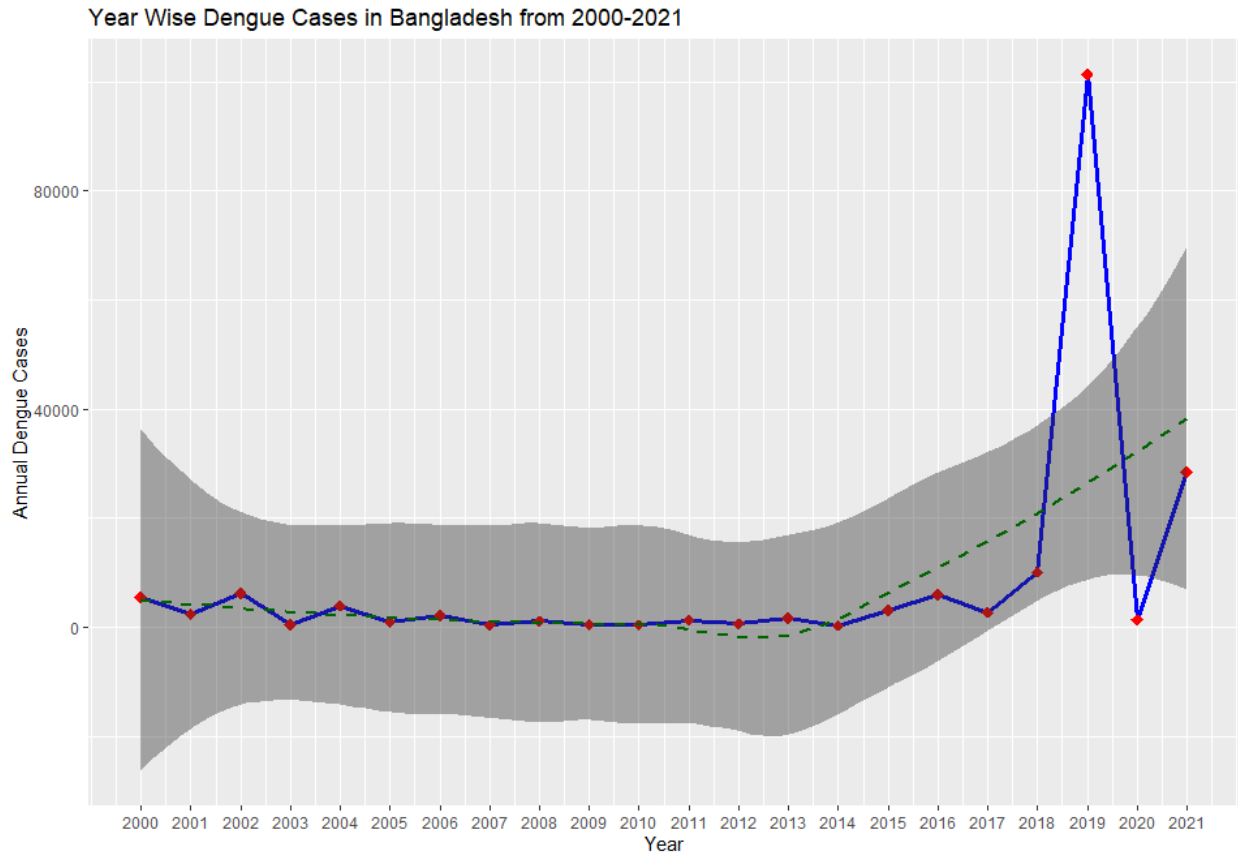

**Fig. S-2: Average temperatures (°C) in Bangladesh from 2000 to 2021:** A LOESS smoothing function is used to obtain a smooth line to represent the trend over the years. The shaded region represents the 95% confidence interval. Dots represent the average temperature of a given year.

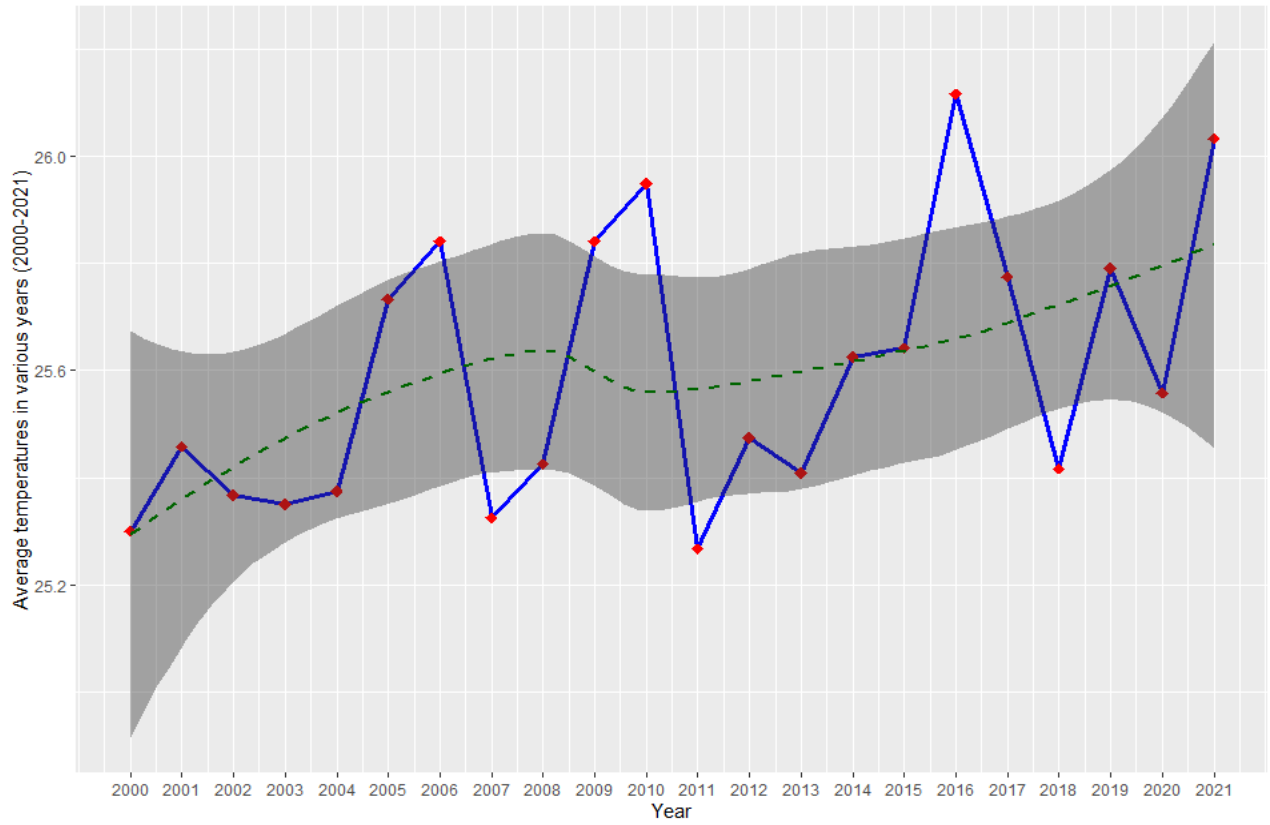

**Fig. S-3: Total rainfall (mm) in Bangladesh from 2000 to 2021:** A LOESS smoothing function is used to obtain a smooth line to represent the trend over the years. The shaded region represents the 95% confidence interval. Dots represent the total rainfall of a given year.

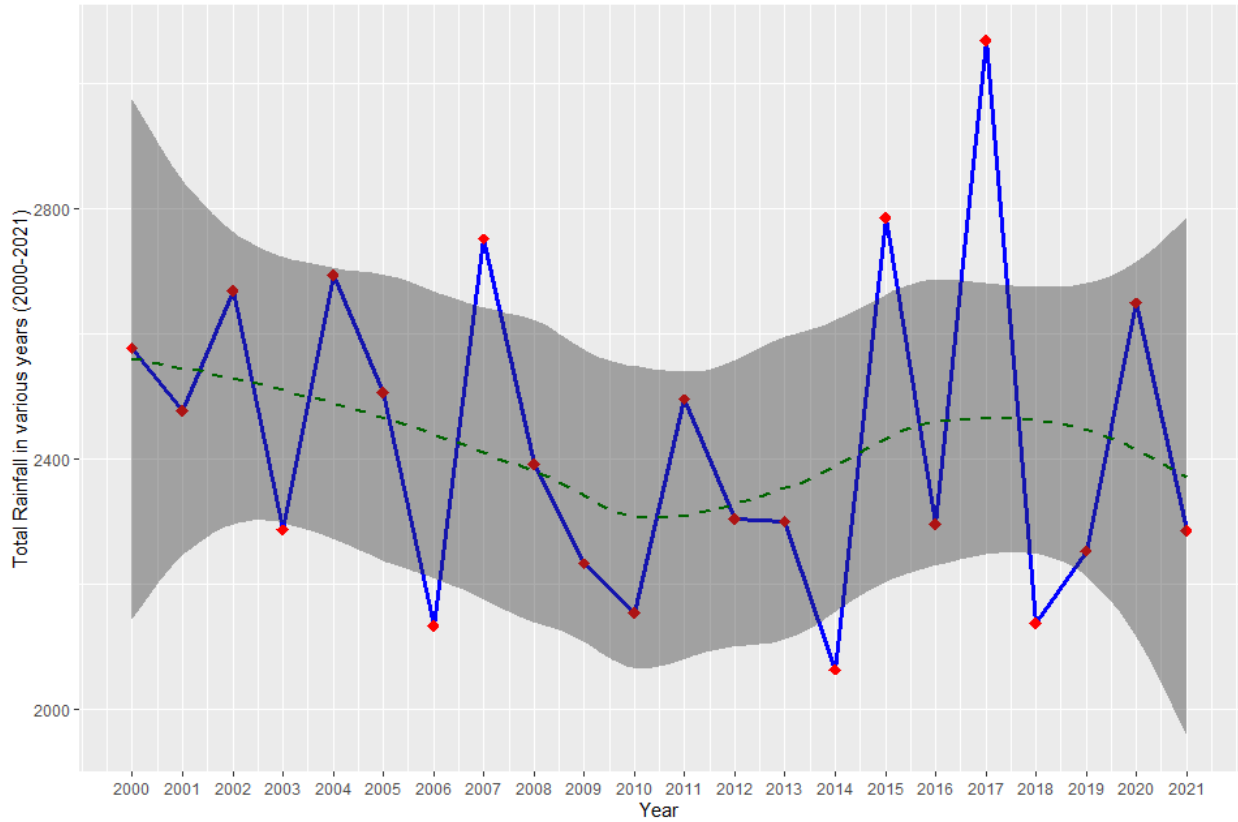

**Fig. S-4: Trends in dengue cases in various months (January to December) from 2000 to 2021. A LOESS smoothing function is used to obtain a smooth line to represent the trend over the years. The shaded region represents the 95% confidence interval. Dots represent the monthly dengue incidence of different years.**

**#1**

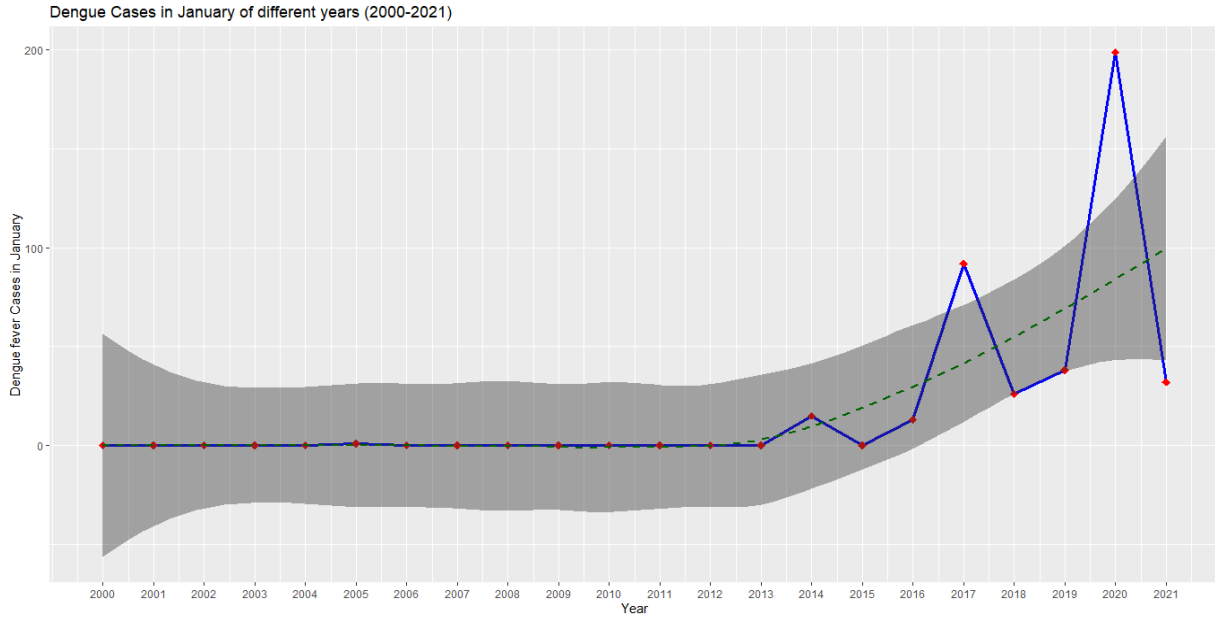

**#2**

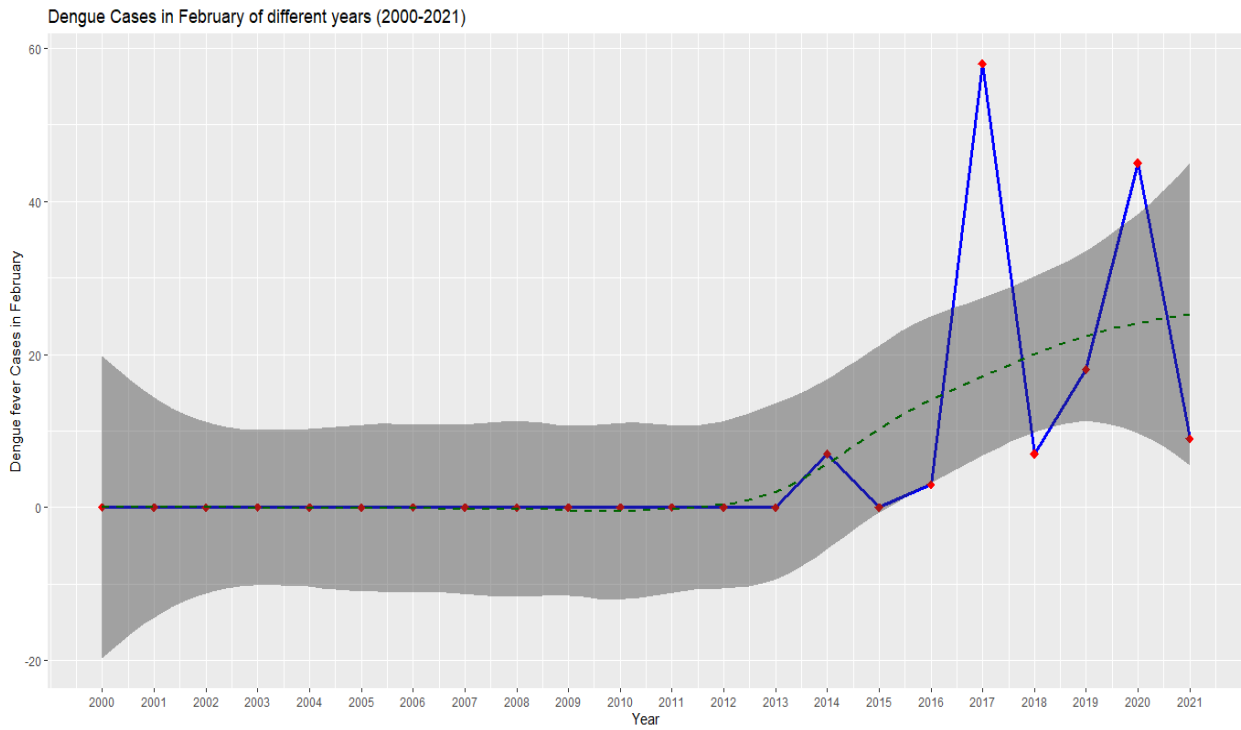

**#3**

Dengue Cases in March of different years (2000-2021)

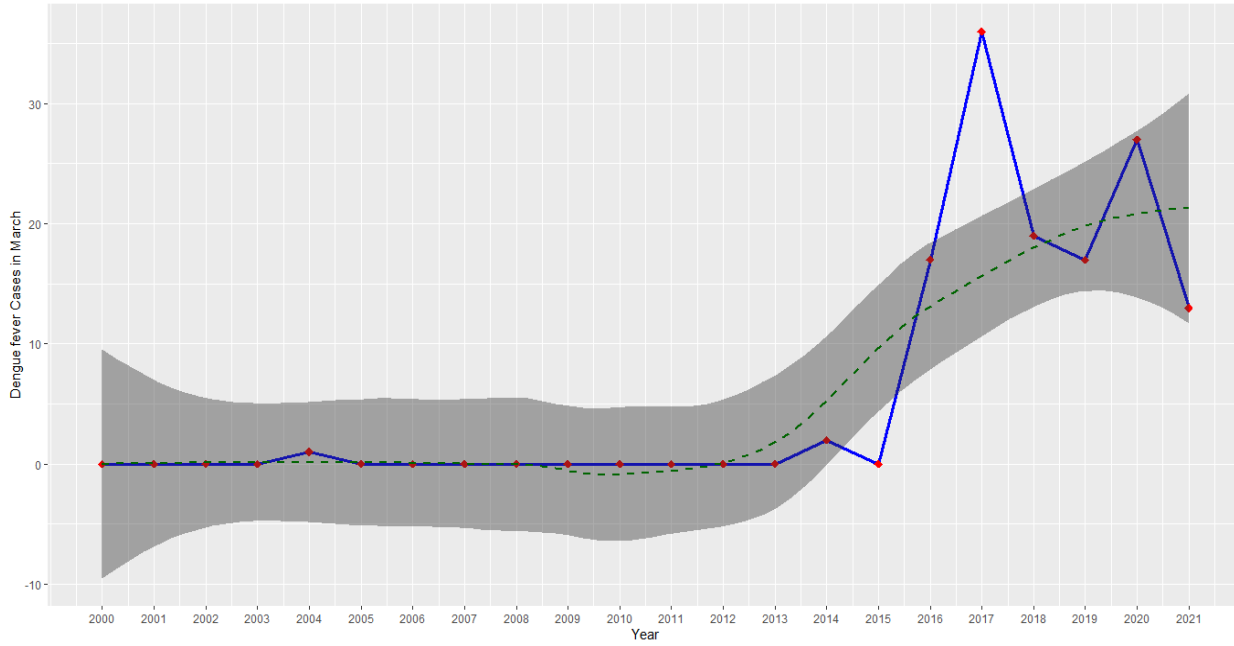

**#4**

Dengue Cases in April of different years (2000-2021)

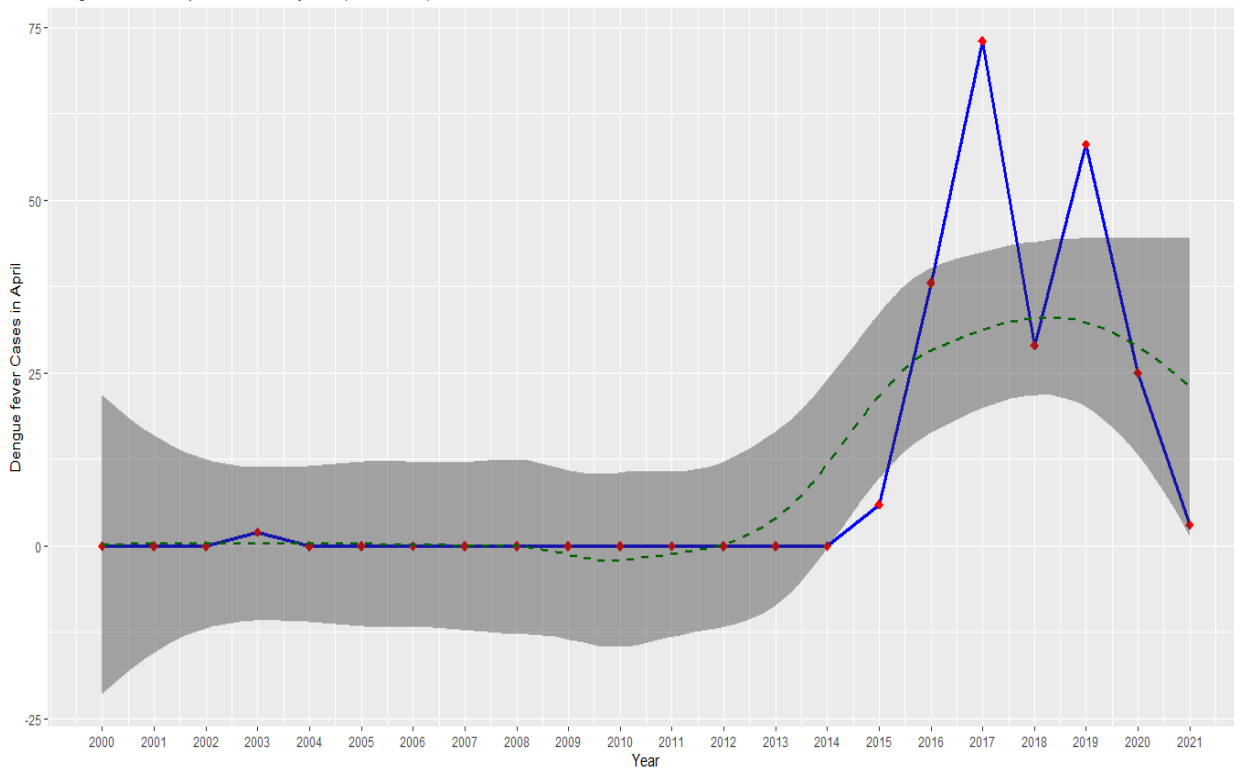

#5

Dengue Cases in May of different years (2000-2021)

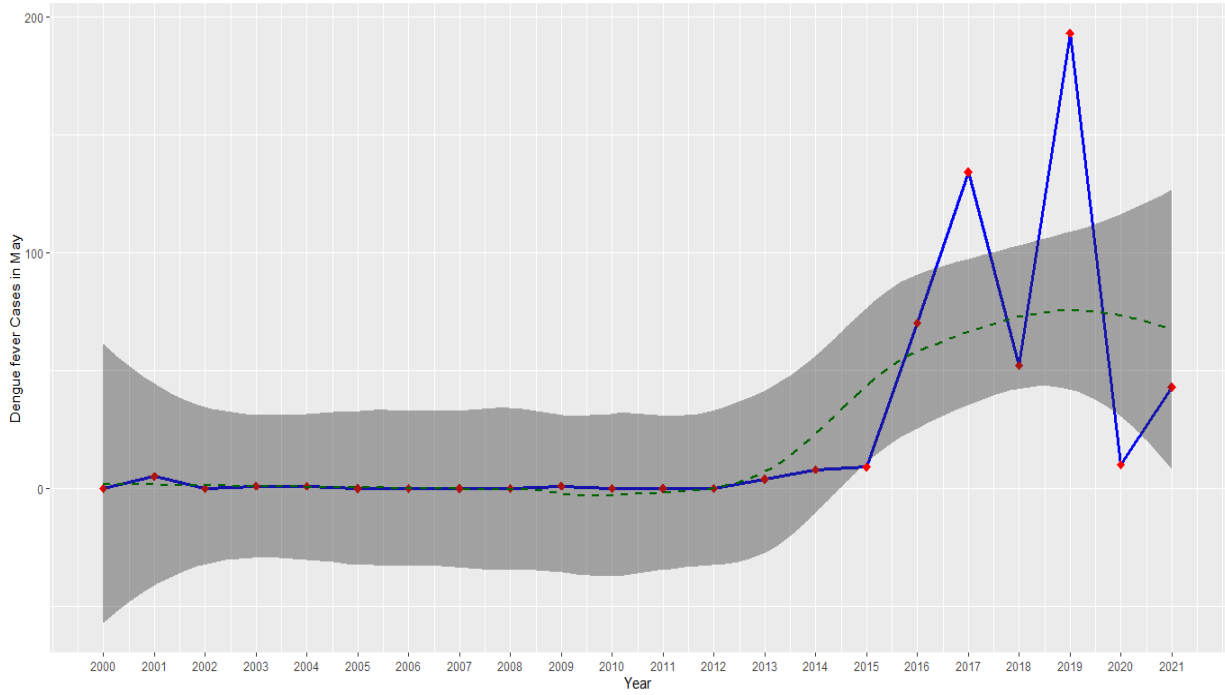

#6

Dengue Cases in June of different years (2000-2021)

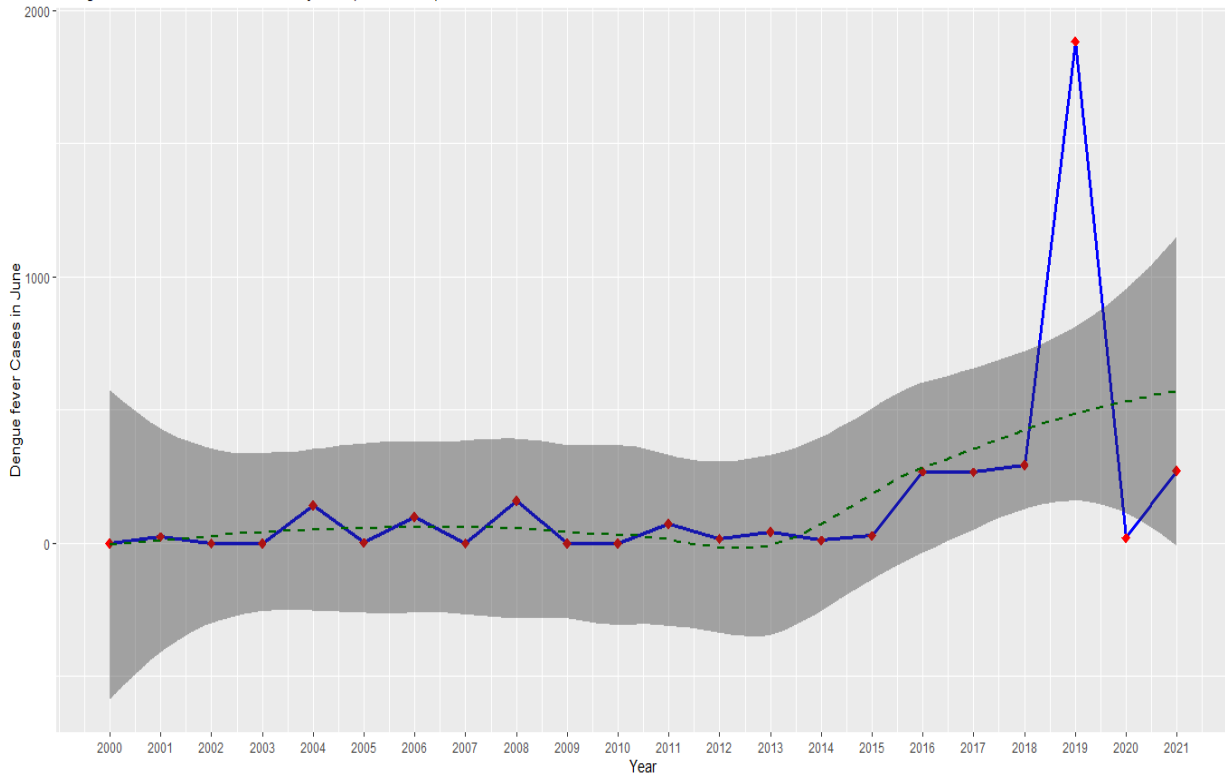



#7

Dengue Cases in July of different years (2000-2021)

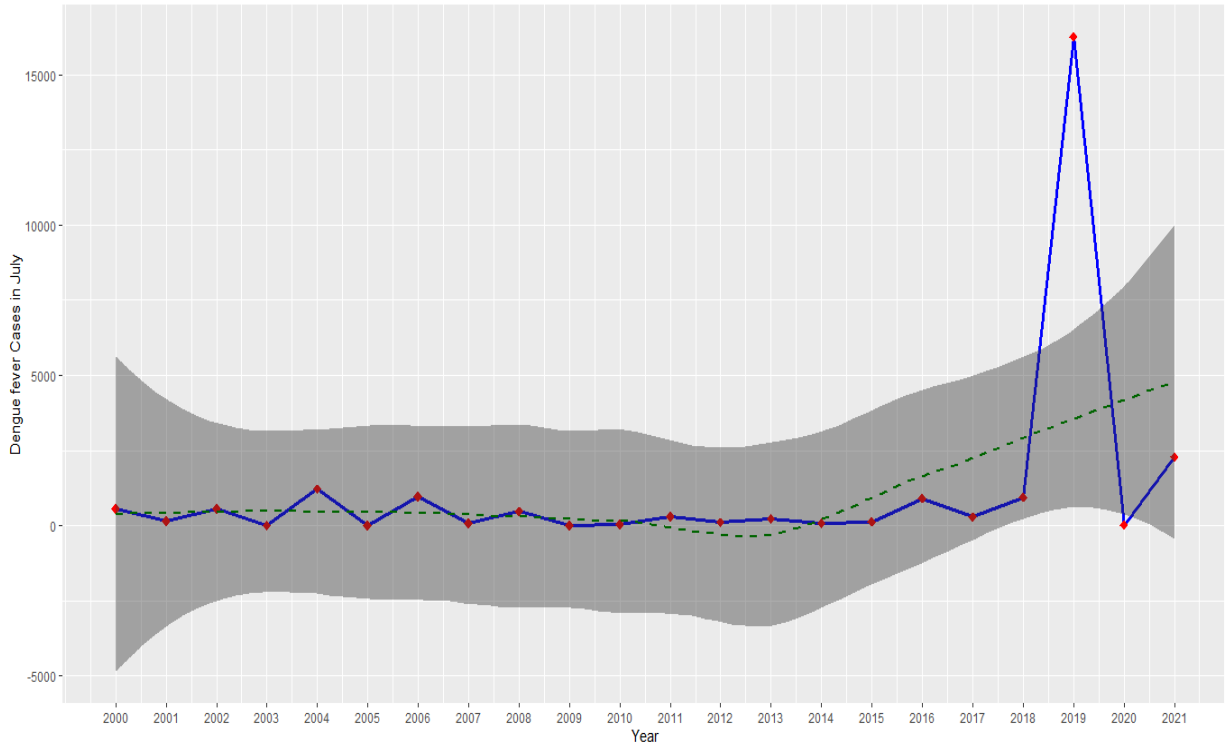

#8

Dengue Cases in August of different years (2000-2021)

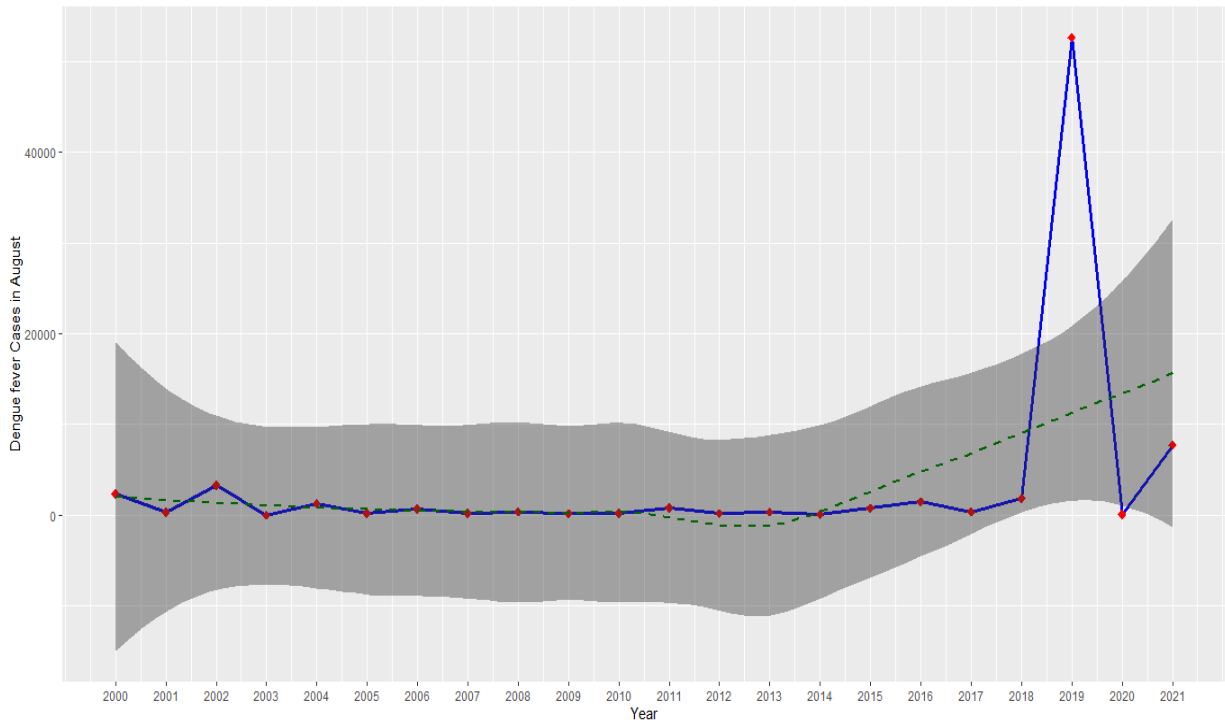

#9

Dengue Cases in September of different years (2000-2021)

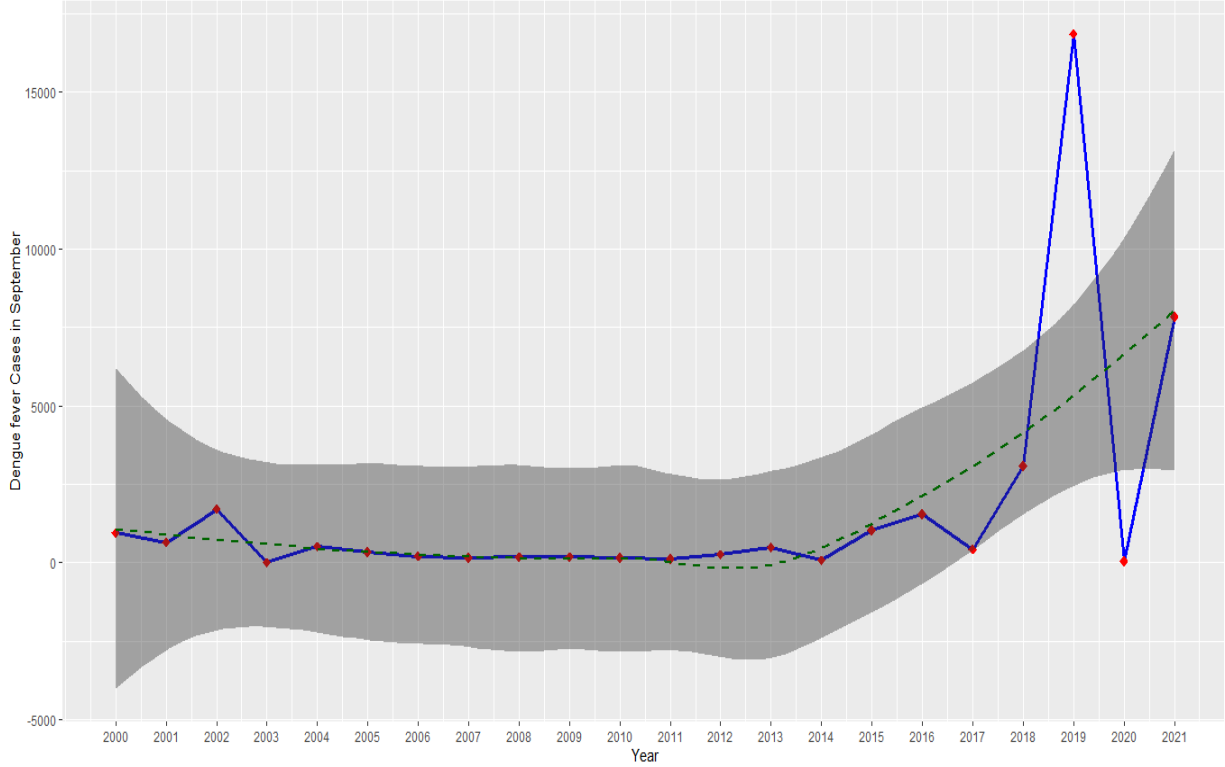

#10

Dengue Cases in October of different years (2000-2021)

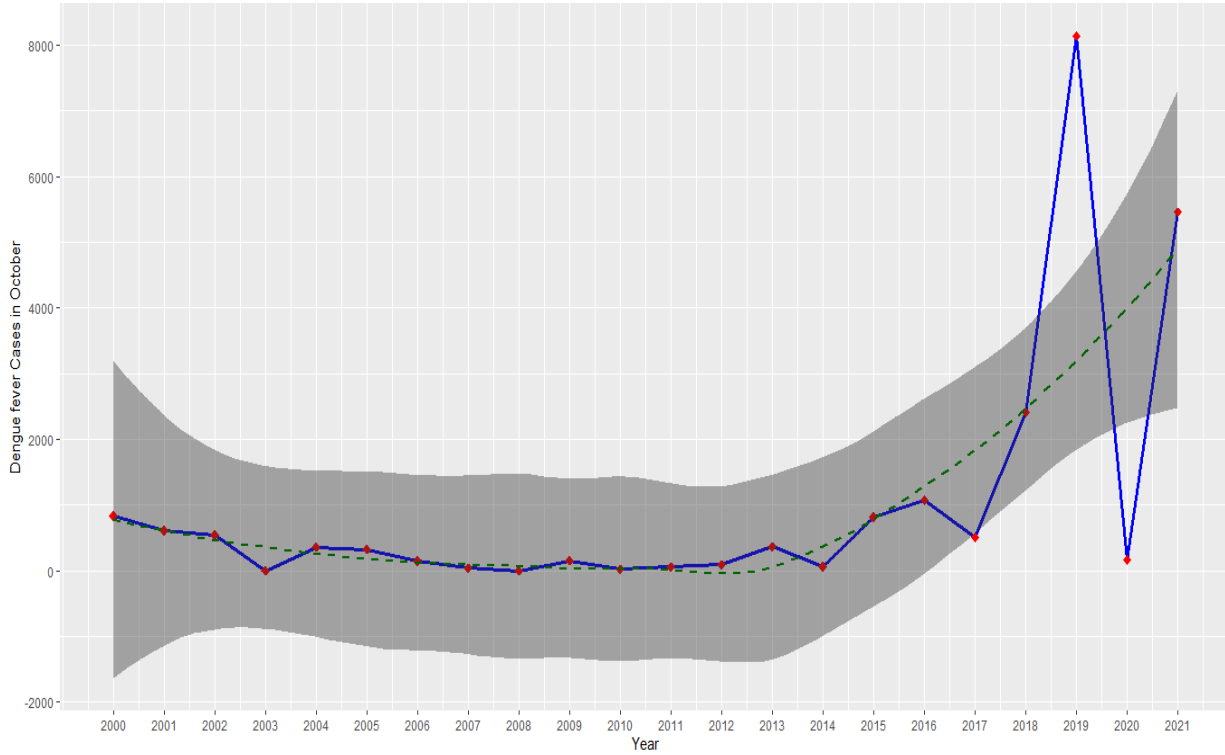

#11

Dengue Cases in November of different years (2000-2021)

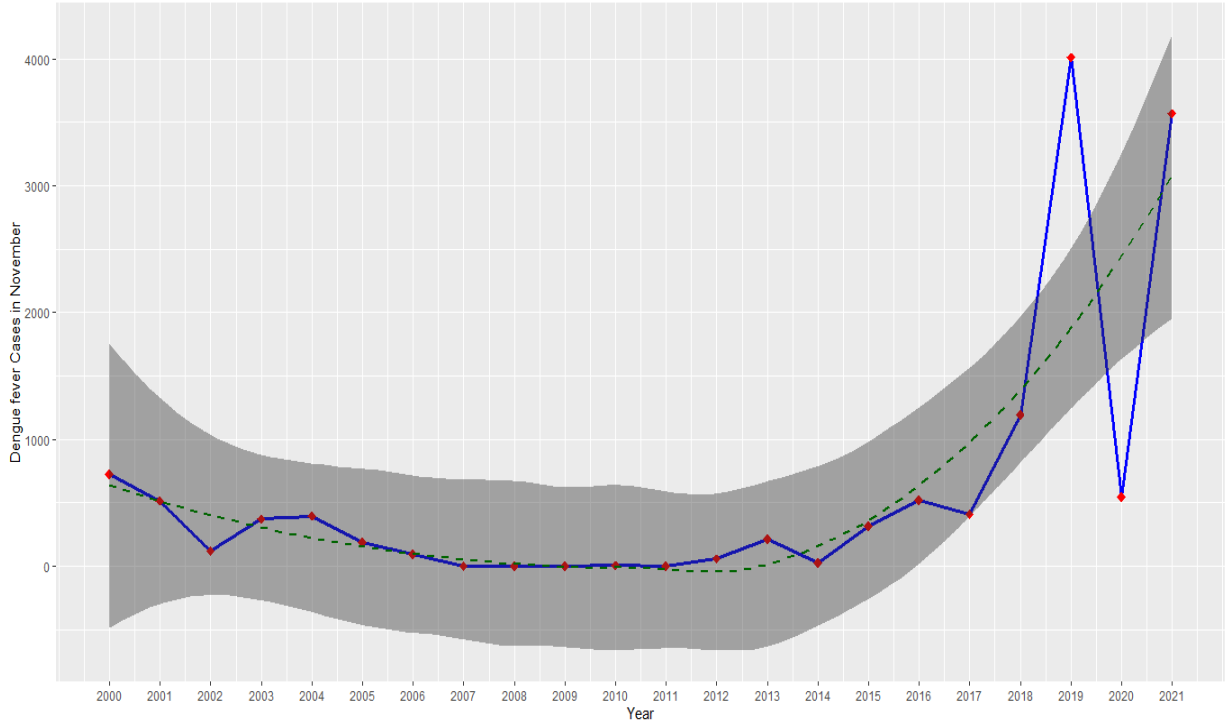

#12

Dengue Cases in December of different years (2000-2021)

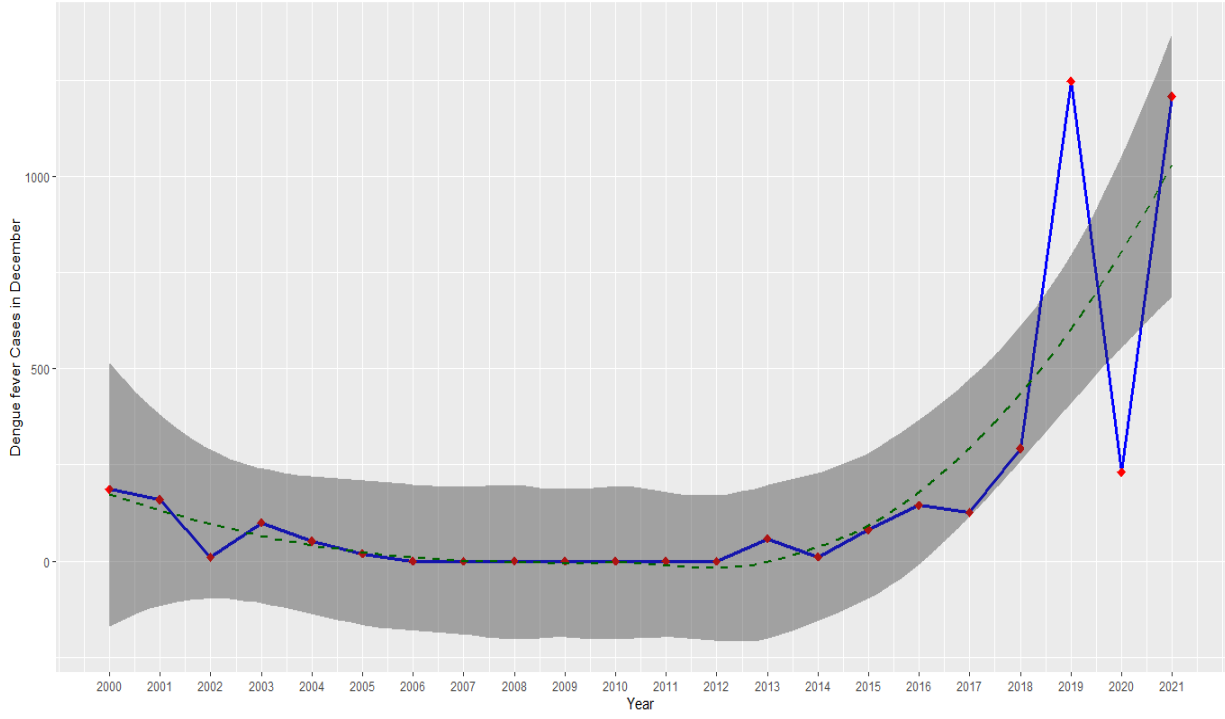

**Fig. S-5: Daily average temperatures (°C) in different months in Bangladesh between January 2000 and December 2021.** A LOESS smoothing function is used to obtain a smooth line to represent the trend over the years. The shaded region represents the 95% confidence interval. Dots represent a given month's daily average temperature for different years.

#1

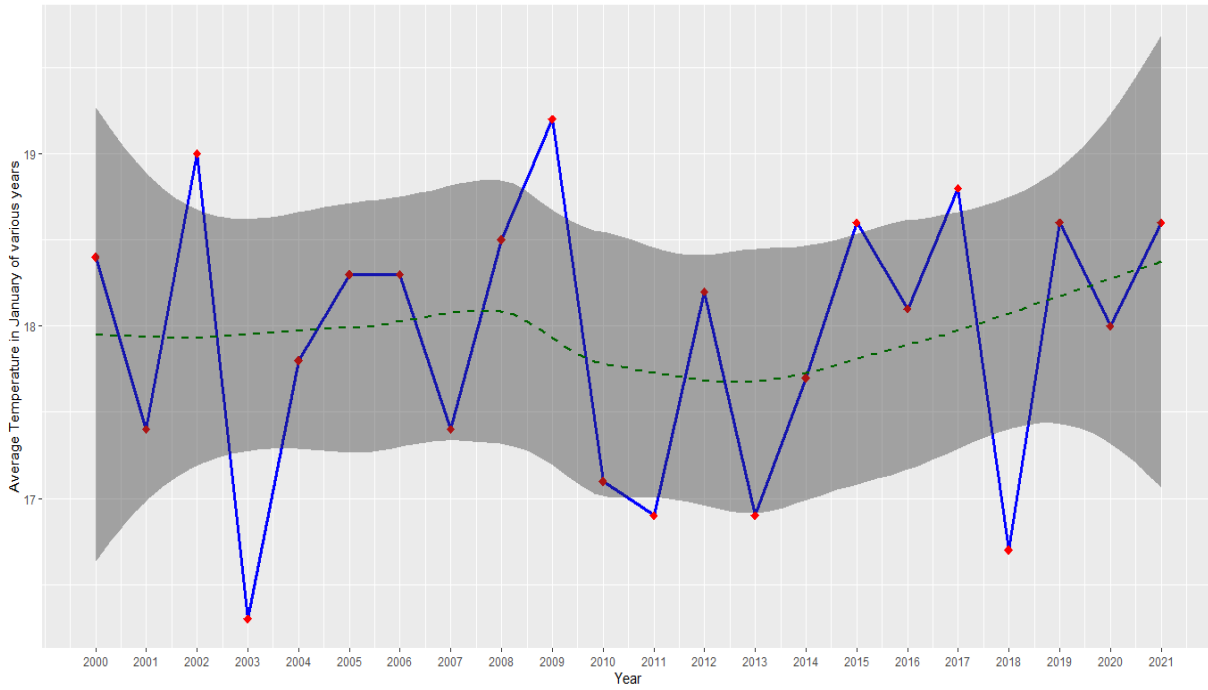

#2

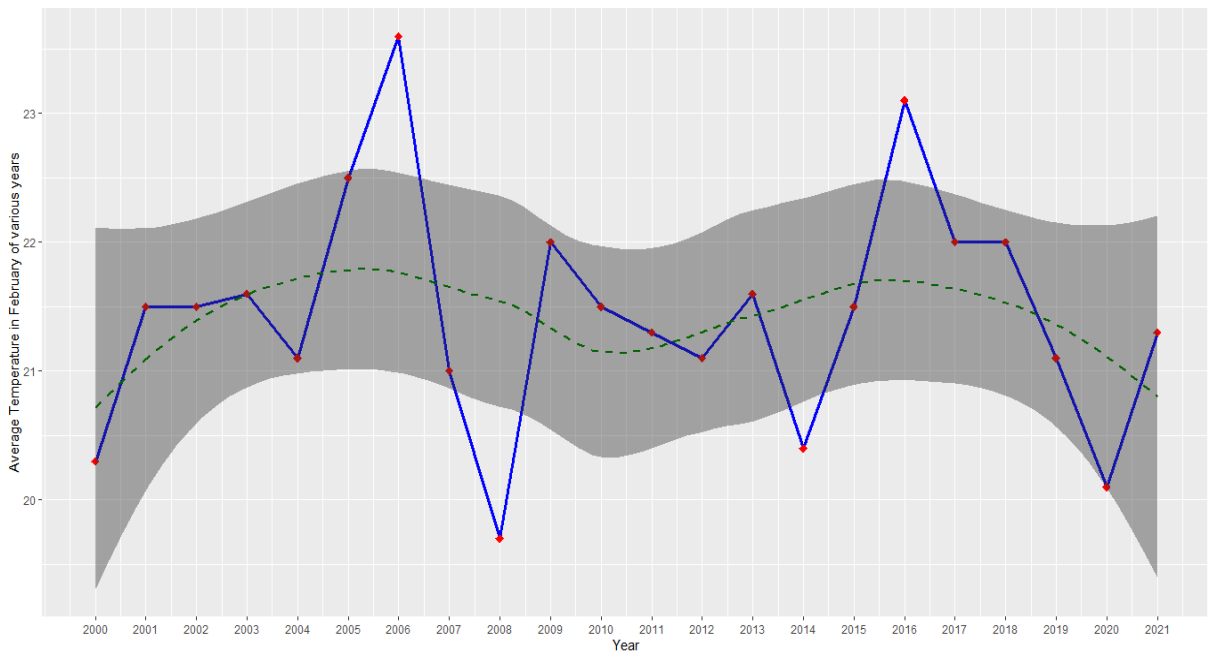

#3

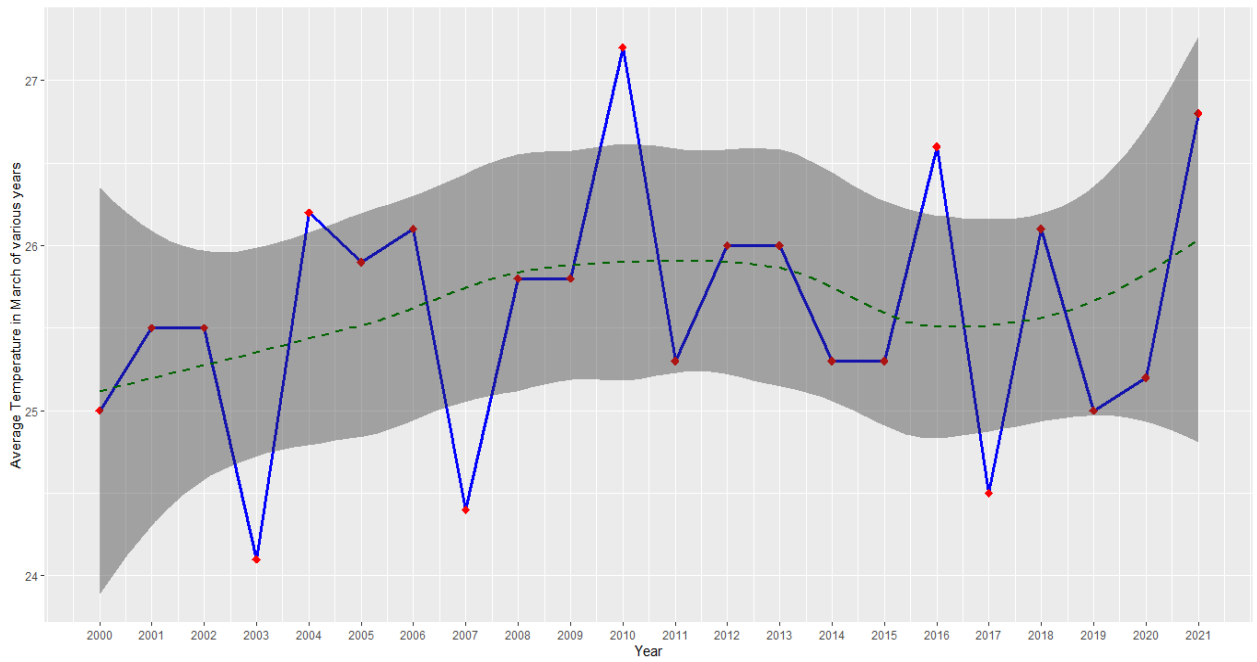

#4

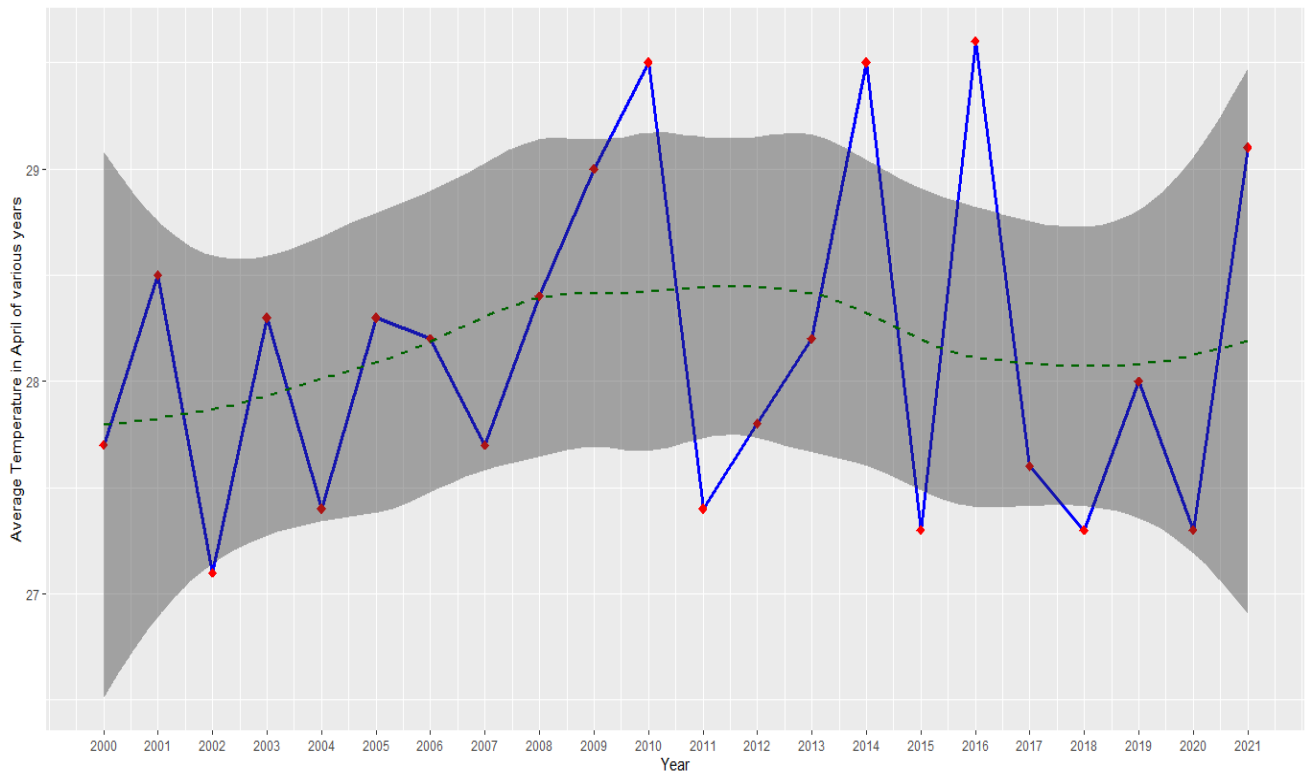

#5

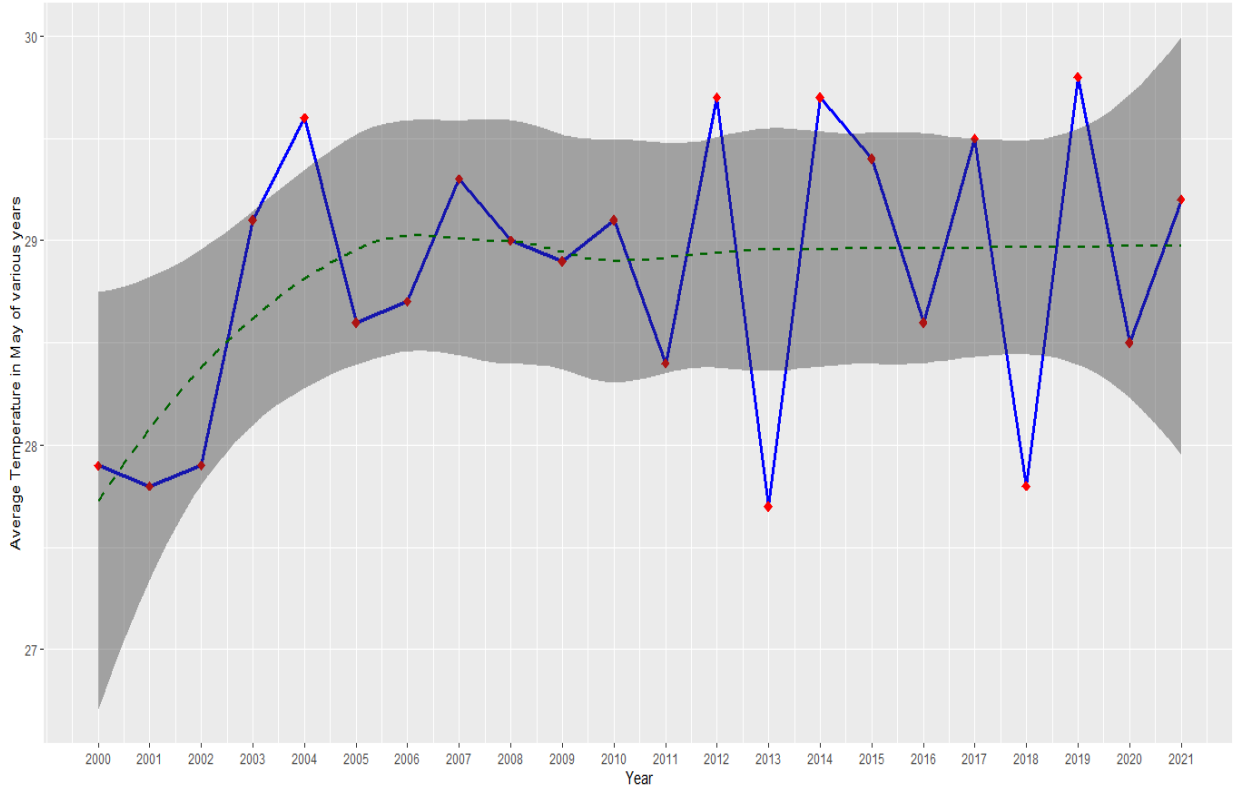

#6

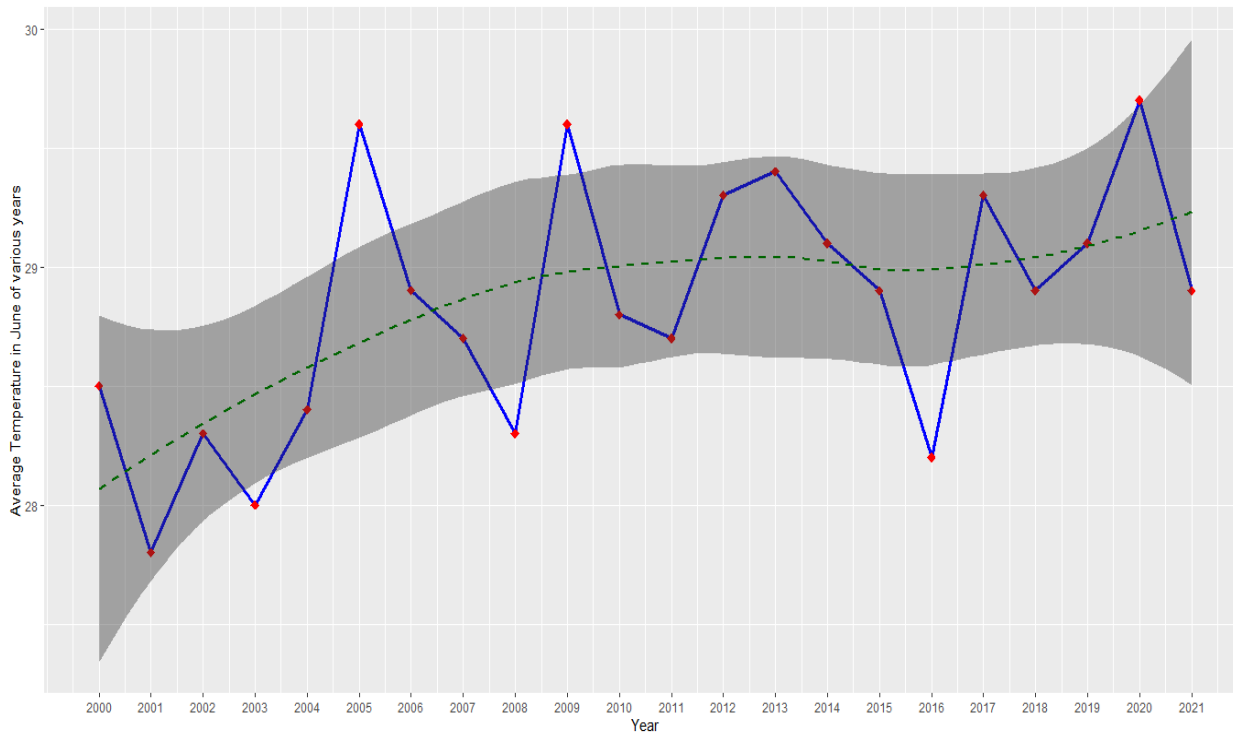

#7

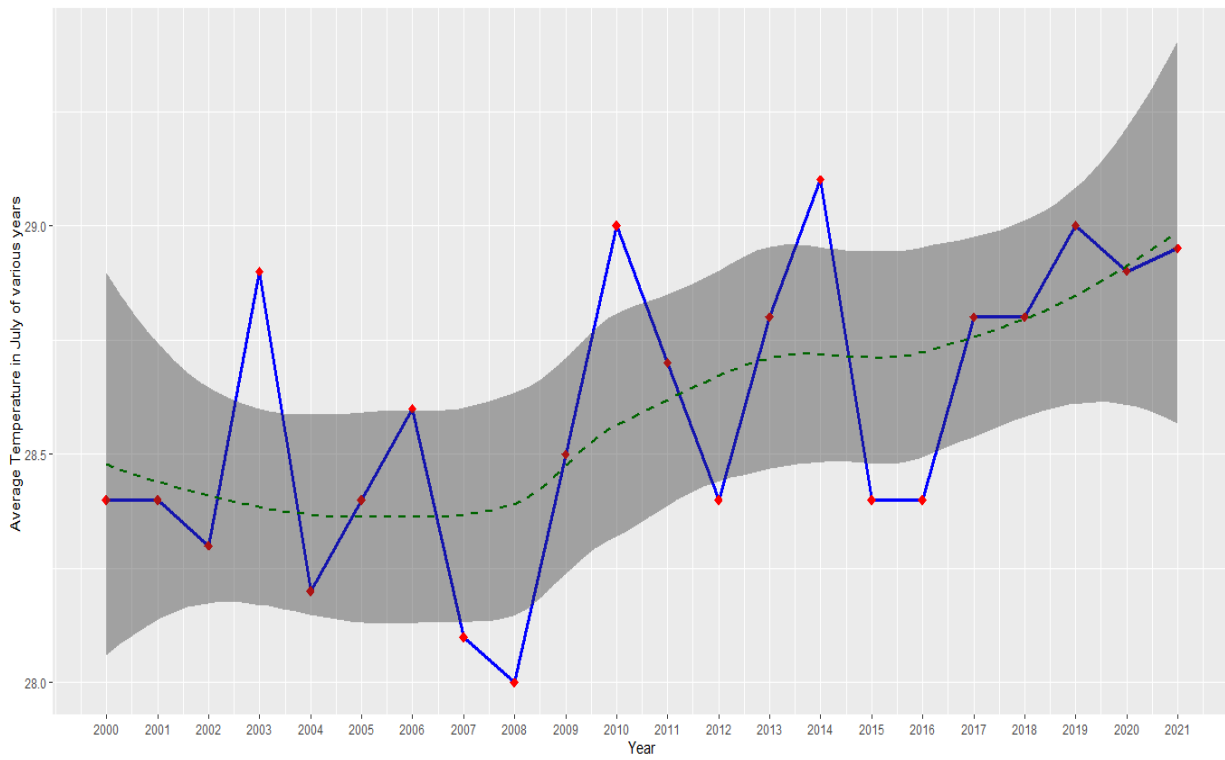

#8

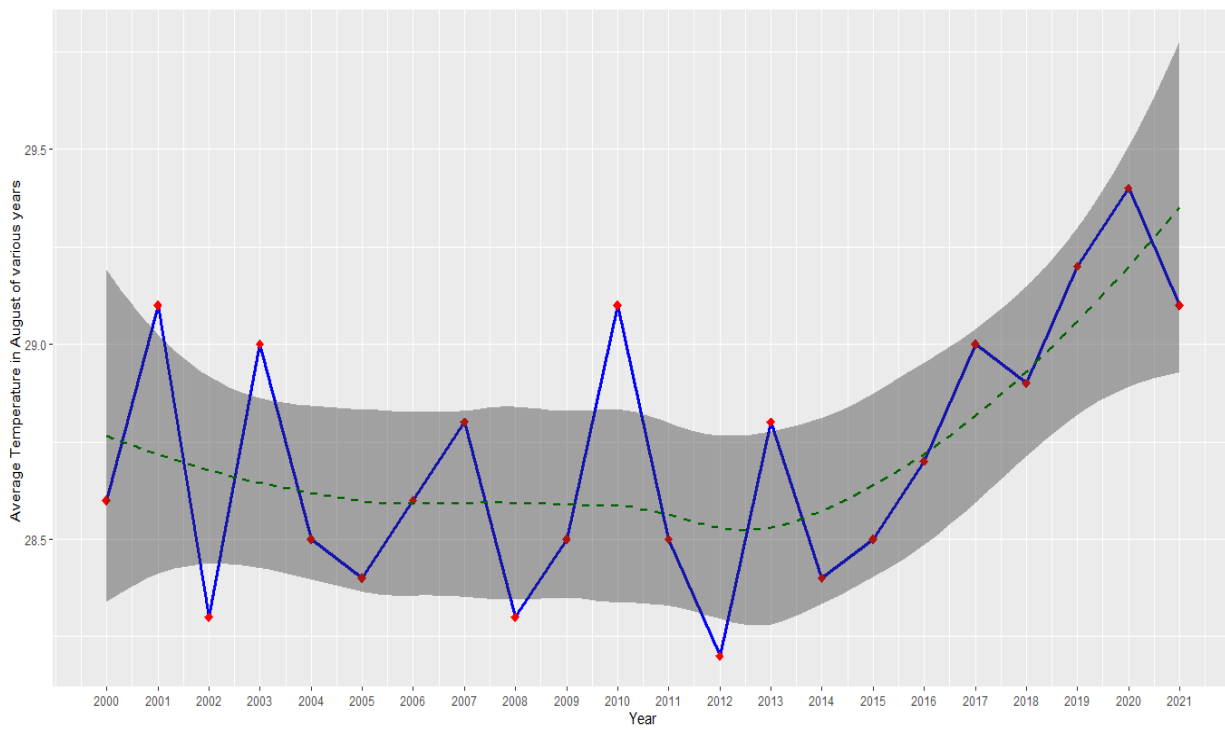

#9

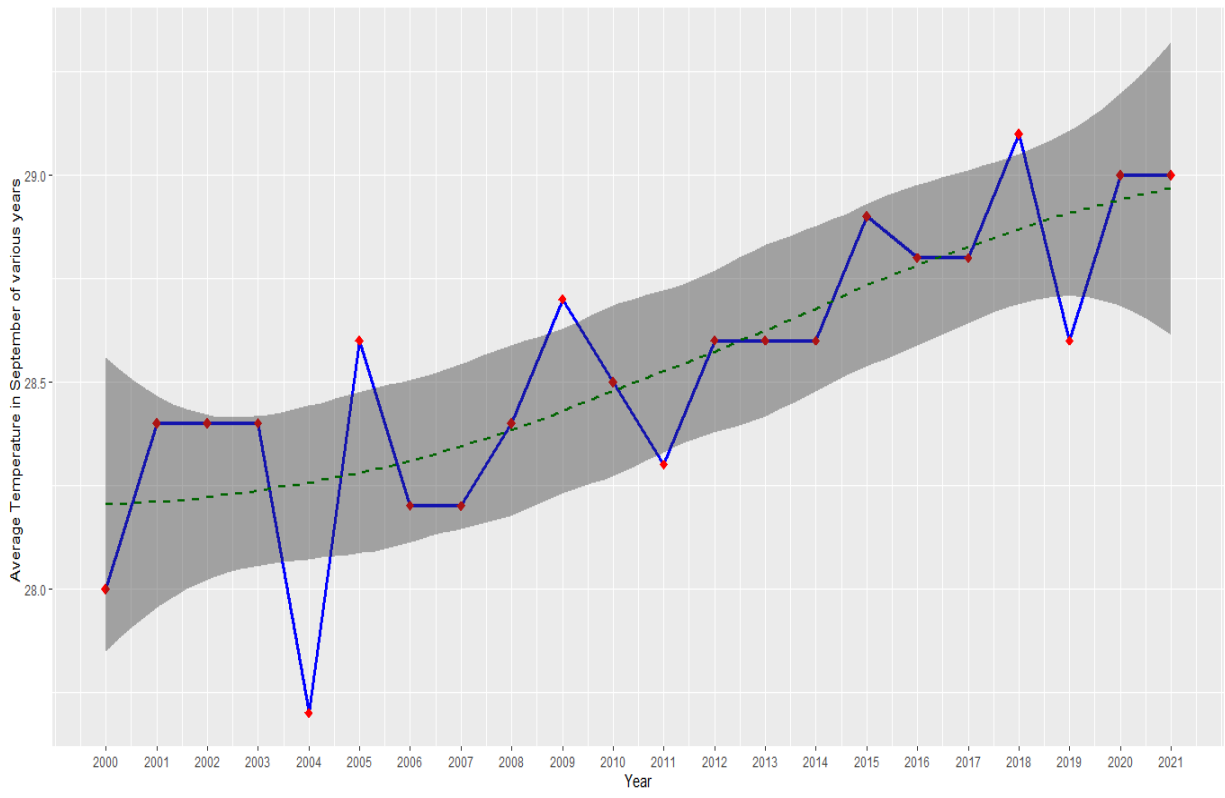

#10

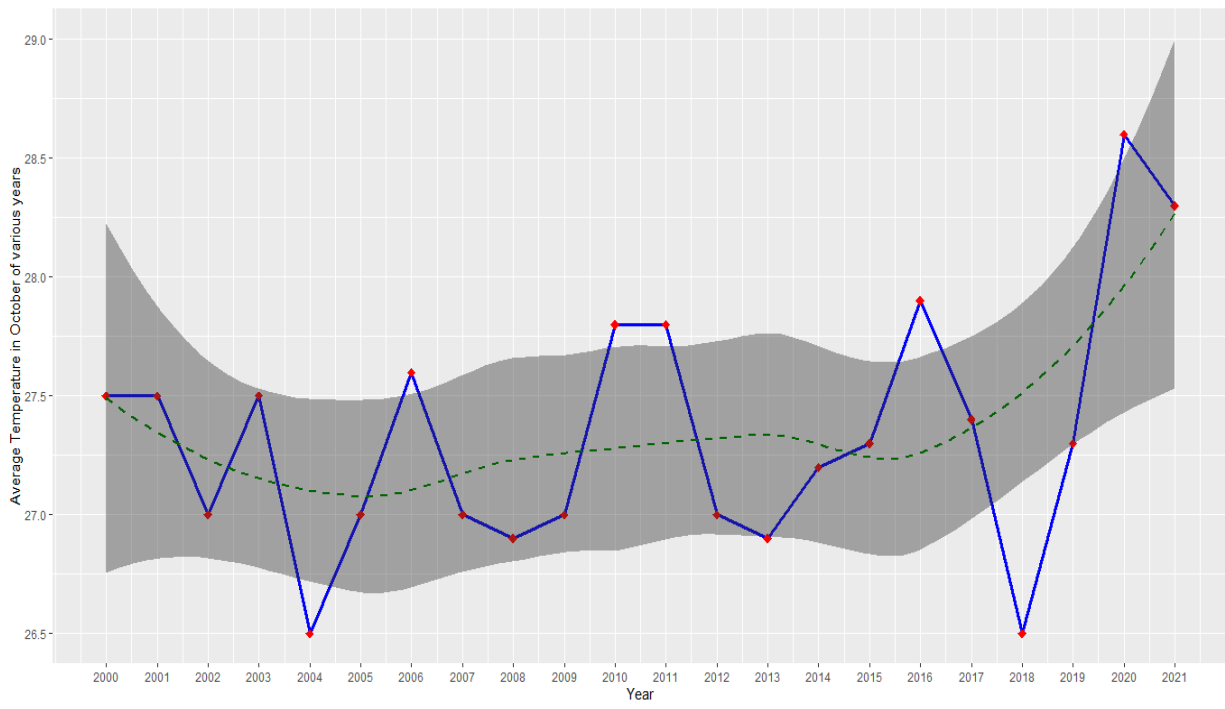



#11

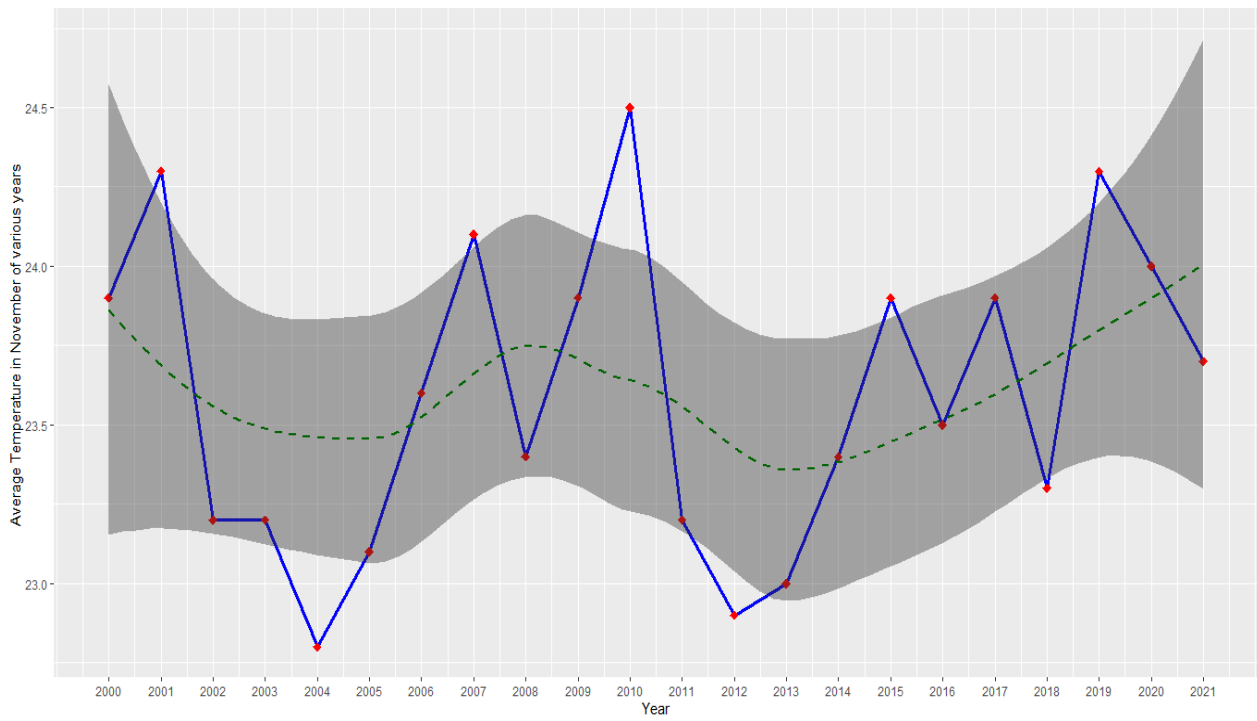

#12

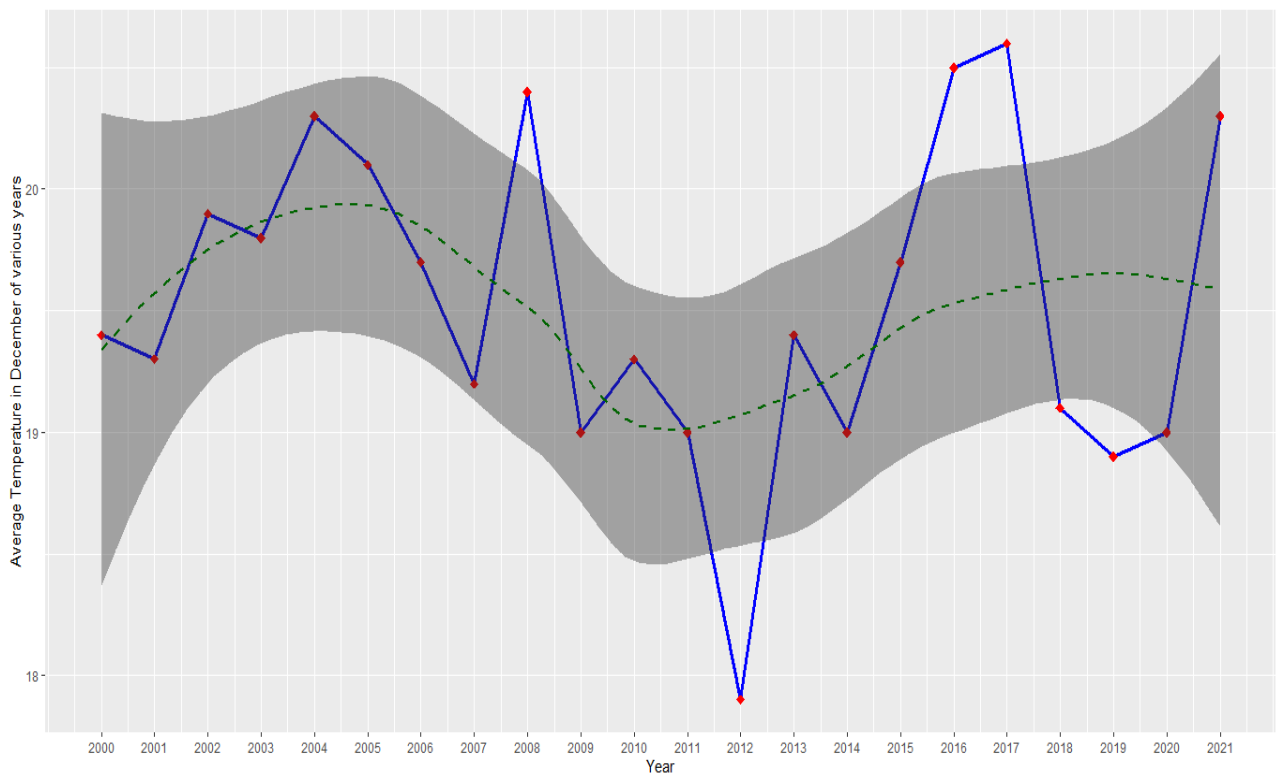

**Fig. S- 6: Monthly total rainfall in Bangladesh between January 2000 and December 2021. A LOESS smoothing function is used to obtain a smooth line to represent the trend over the years. The shaded region represents the 95% confidence interval. Dots represent the monthly total rainfall of a given month for different years.**

#1

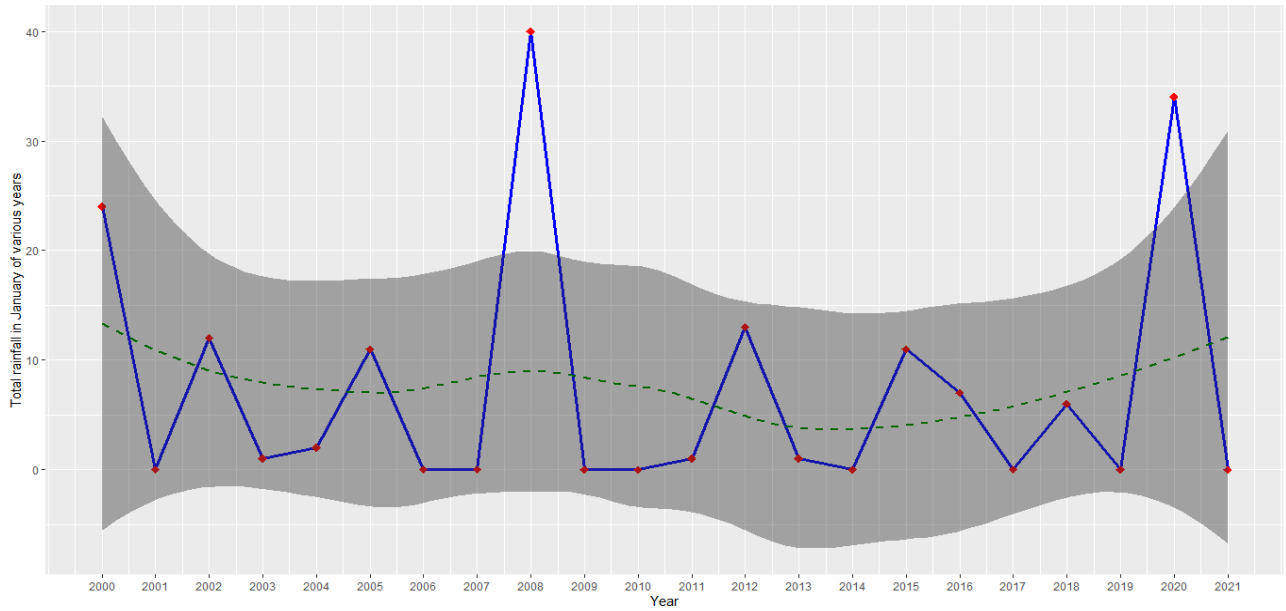

#2

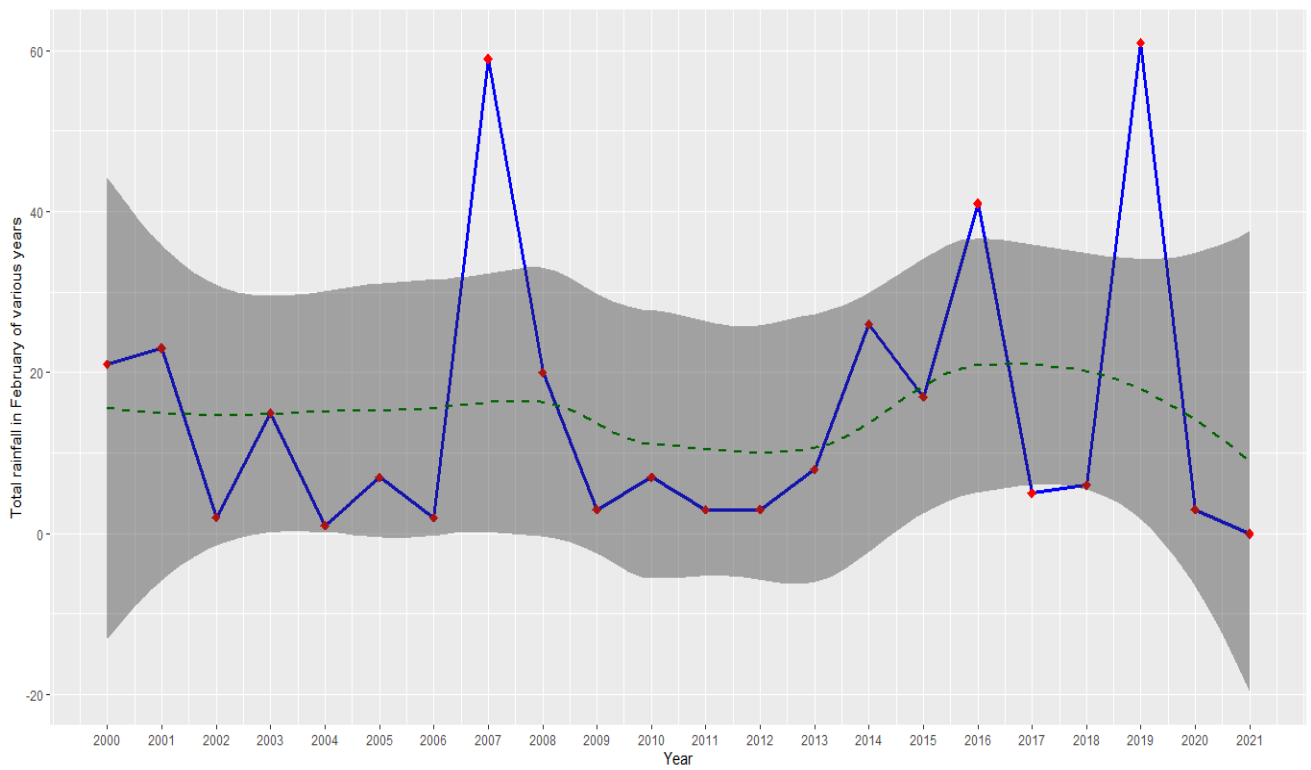

#3

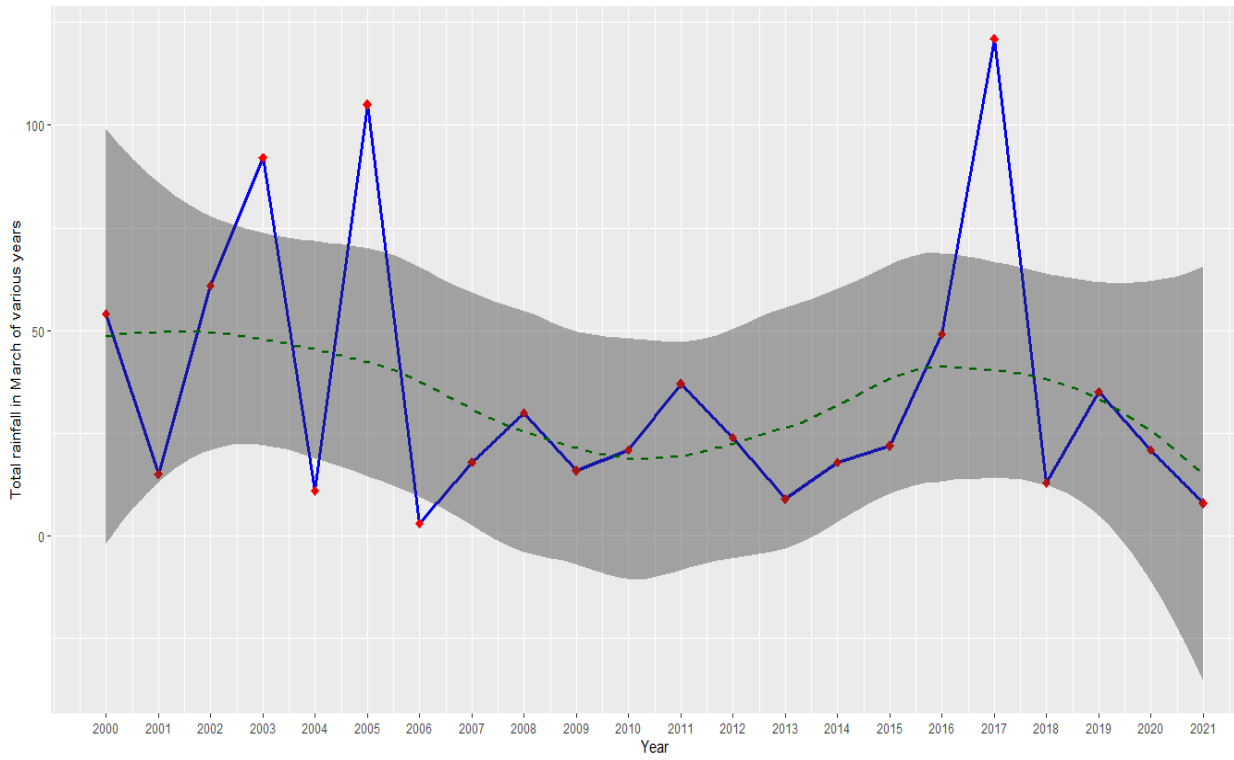

#4

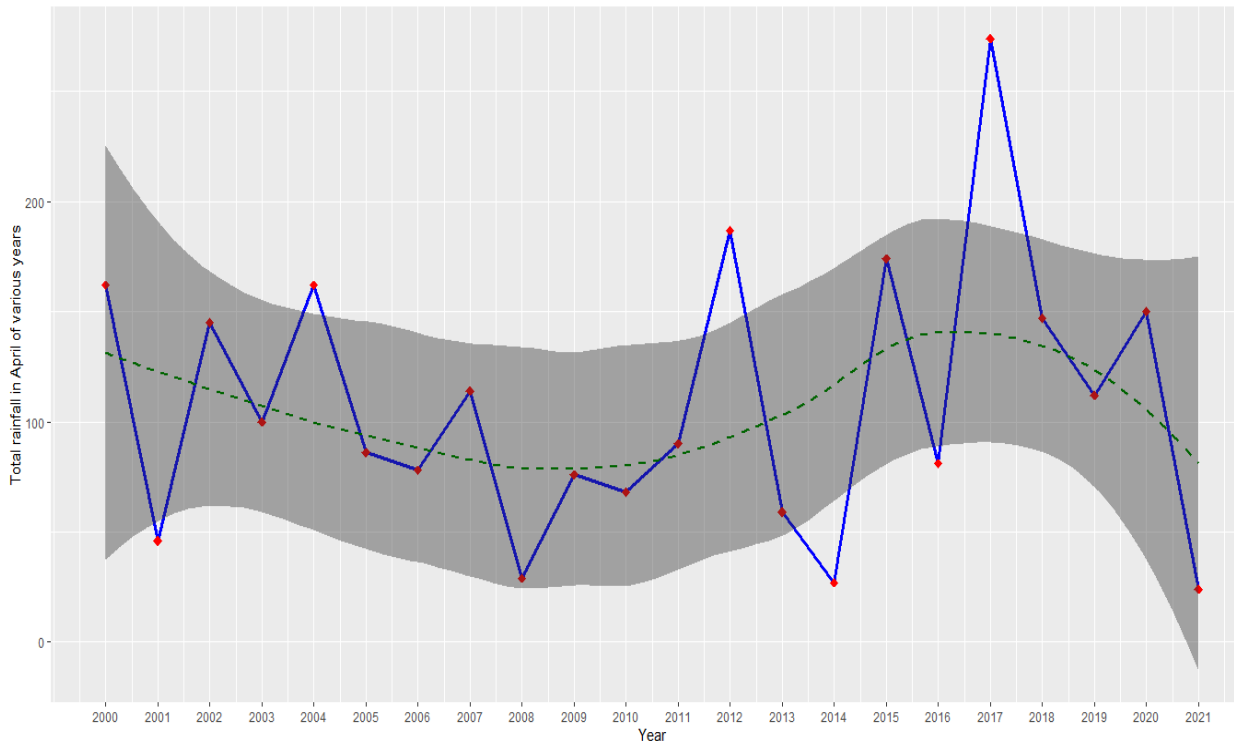

#5

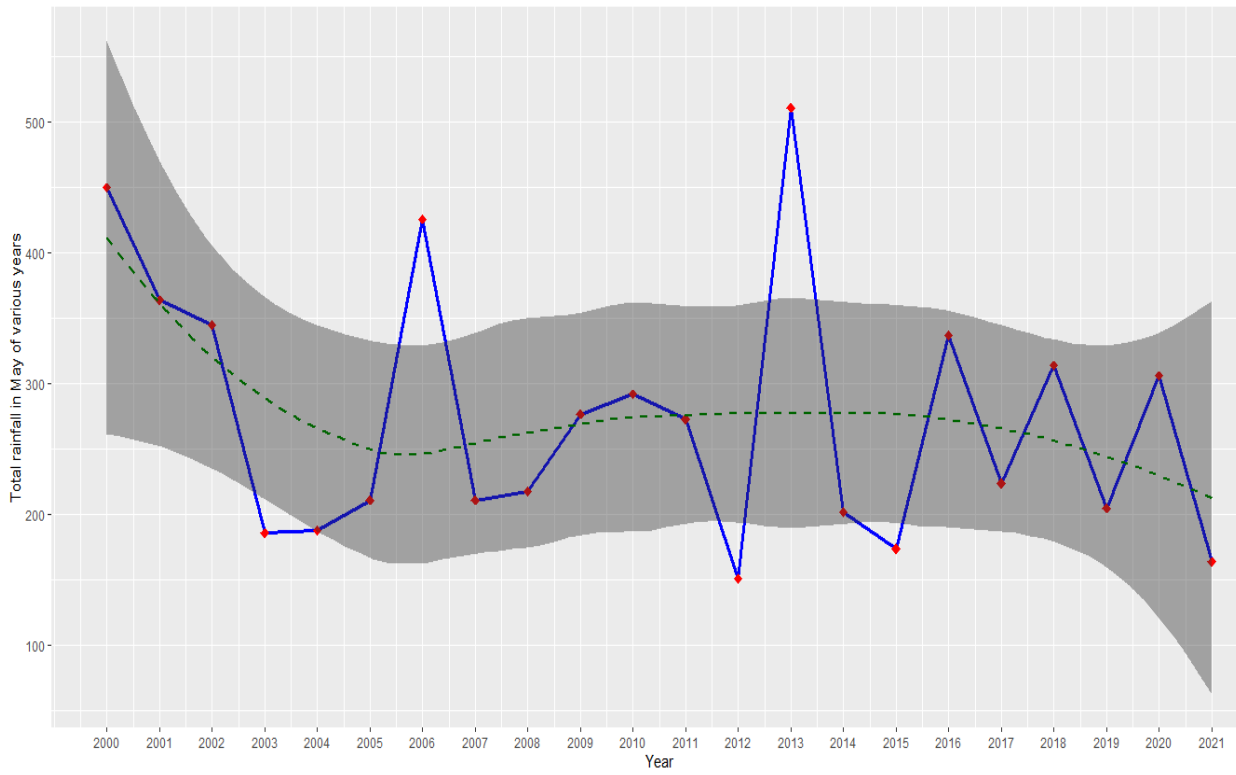

#6

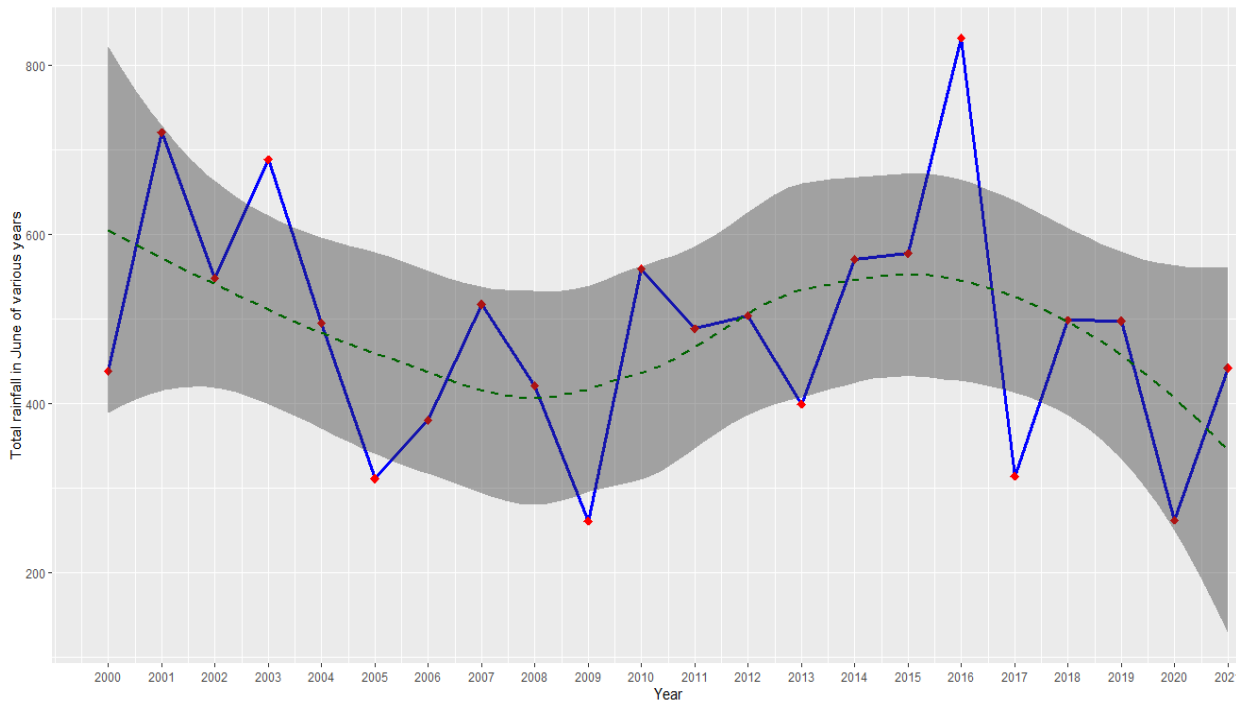

#7

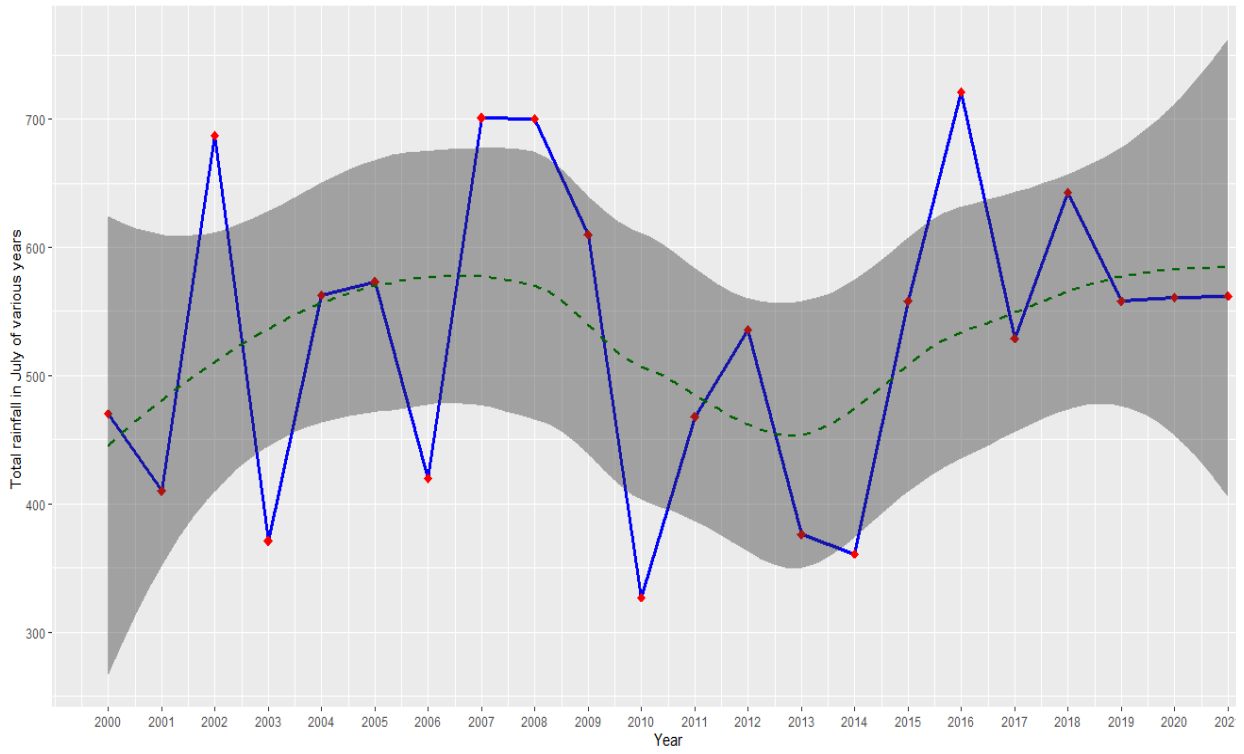

#8

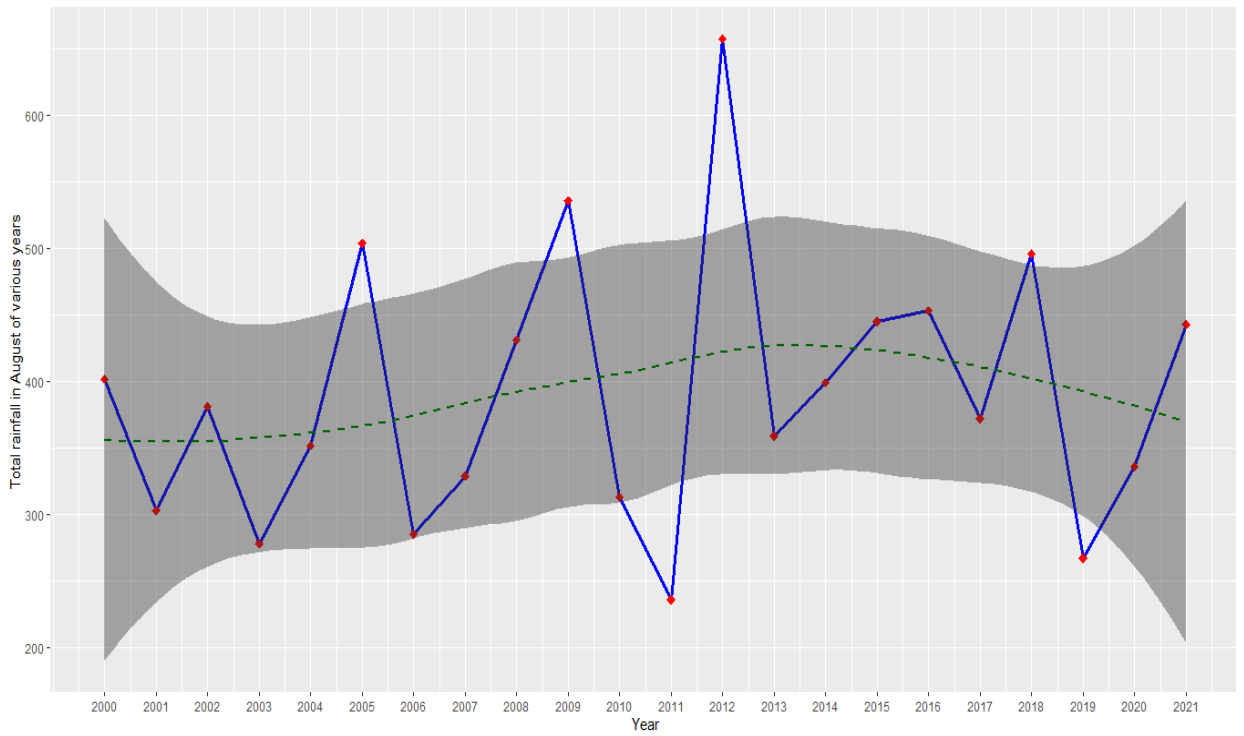

#9

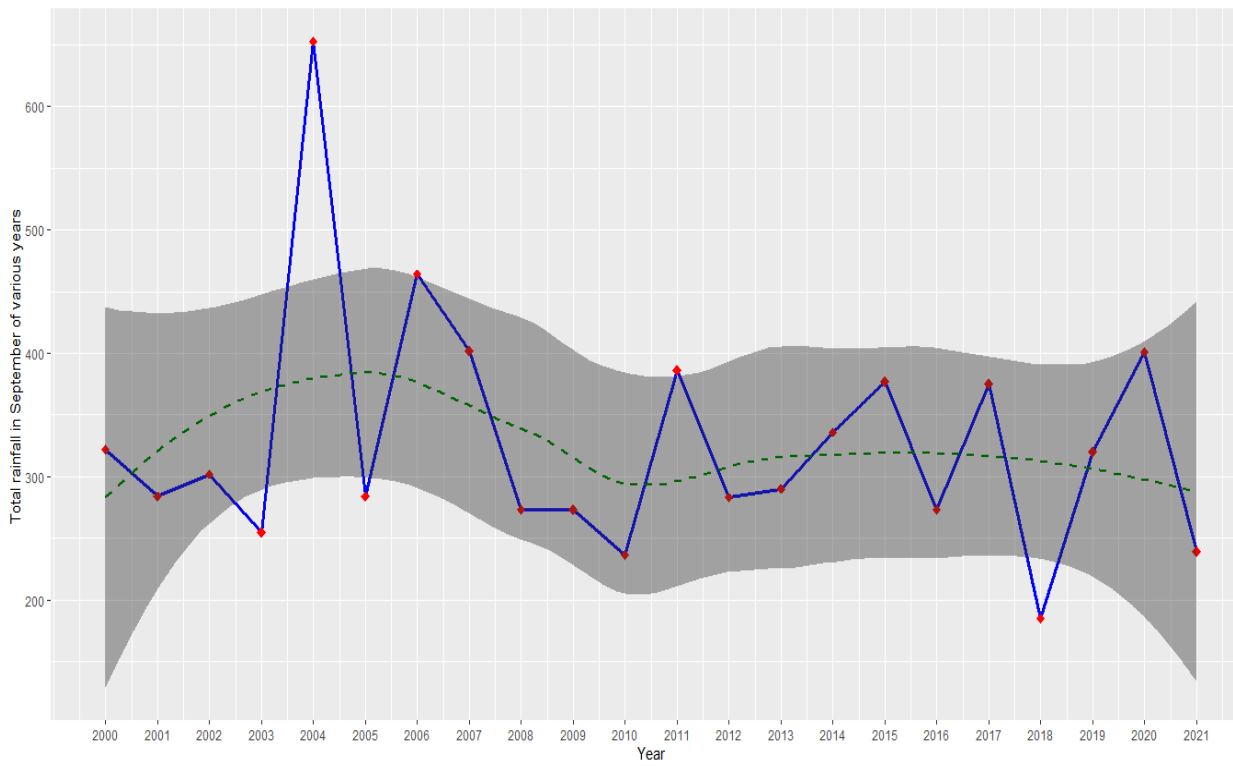

#10

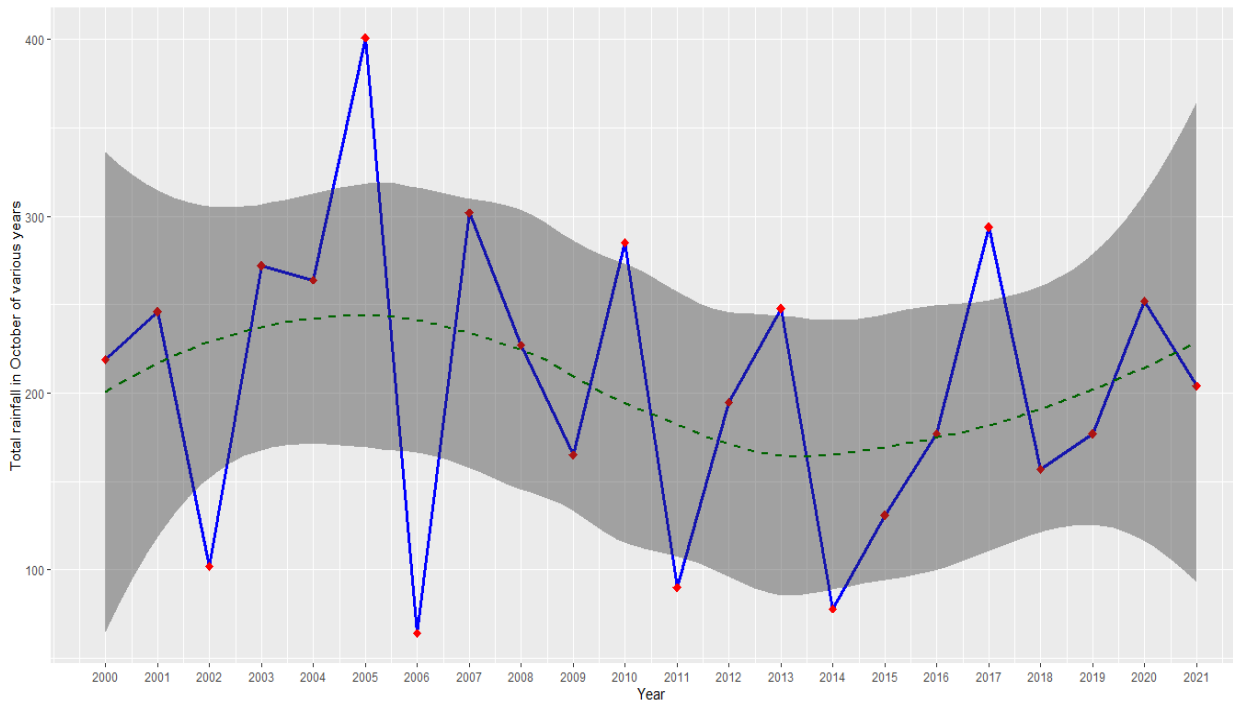

#11

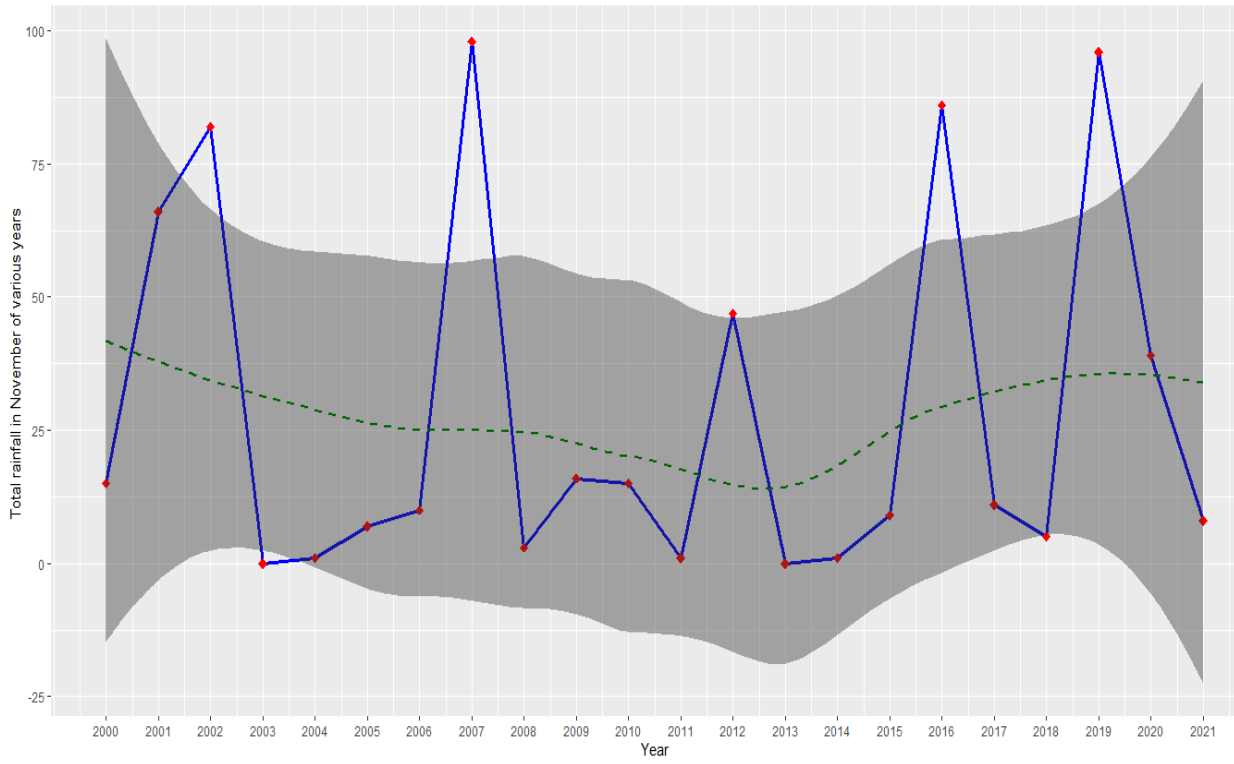

#12

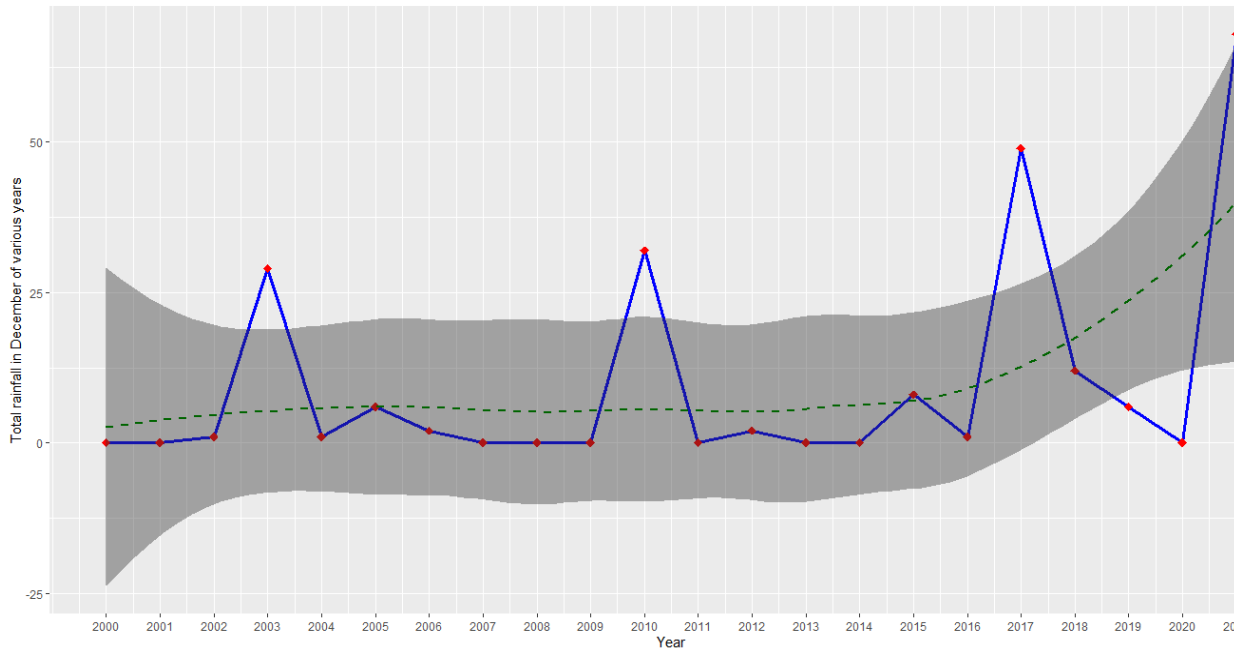

Supplement: f1 [file 2131801.f1.pdf]
